# A Comparative Assessment of Visceral Leishmaniasis Burden in Two Eco-epidemiologically Different Countries, India and Sudan

Kamal Barley<sup>1,2</sup>, Anuj Mubayi<sup>2,4,\*</sup>, Muntaser Safan<sup>2,3</sup>, Carlos Castillo-Chavez<sup>2,4</sup>

<sup>1</sup>*Applied Mathematics and Statistics, Stony Brook University, Stony Brook NY 11794 USA*

<sup>2</sup>*Simon A. Levin Mathematical Computational and Modeling Sciences Center, Arizona State University, Tempe, AZ, 85287 USA*

<sup>3</sup>*Department of Mathematics, Faculty of Science, Mansoura University, Mansoura 35516, Egypt*

<sup>4</sup>*School of Human Evolution and Social Change, Arizona State University, Tempe, AZ, 85287 USA*

\*Corresponding author; email: amubayi@asu.edu

## Abstract

The two hyper-endemic regions for Visceral Leishmaniasis (VL) in the world are located in India and Sudan. These two countries account for more than half of the world's VL burden. The regional risk factors associated with VL vary drastically per region. A mathematical model of VL transmission dynamics is introduced and parametrized to quantify risk of VL infection in India and Sudan via a careful analysis of VL prevalence level and the control reproductive number,  $\mathcal{R}_C$ , a metric often used to characterize the degree of endemicity. Parameters, associated with VL-epidemiology for India and Sudan, are estimated using data from health departmental reports, clinical trials, field studies, and surveys in order to assess potential differences between the hyper-endemic regions of India and Sudan. The estimated value of reproduction number for India is found to be 60% higher than that of Sudan ( $\mathcal{R}_C(\text{India}) = 2.1$  and  $\mathcal{R}_C(\text{Sudan}) = 1.3$ ). It is observed that the  $\mathcal{R}_C$  is most sensitive to the average biting rate and vector-human transmission rates irrespective of regional differences. The treatment rate is found to be the most sensitive parameter to VL prevalence in humans for both India and Sudan. Although the unexplained higher incidence of VL in India needs to be carefully monitored during long-term empirical follow-up, the risk factors associated with vectors are identified as more critical to dynamics of VL than factors related to humans through this modeling study.

*Keywords:* Dynamical system, Kala-azar, Sensitivity Analysis, Risk Factors, Reproduction Number, Mathematical Model

## Author Summary

The Visceral Leishmaniasis (VL) is a neglected tropical disease, primarily endemic in five countries, with India and Sudan having the highest burden. The risk factors associated with VL are either unknown in some regions or vary drastically among empirical studies. In this study, we collect VL-related data from multiple sources for the two different countries, India and Sudan, and use techniques from mathematical modeling to understand factors that may be critical in the spread and control of VL. The results suggest that the risk factors associated with disease progression are important in explaining high VL prevalence in both the countries. However, the likelihood of disease outbreak in India is much higher than that in Sudan and the probability of transmission between human and sandfly populations vary significantly between the two. The results have implications towards VL elimination and may require a review of current control priorities.

## 42 1 Introduction

43 **Leishmaniasis Globally:** Leishmaniasis is a family of infectious diseases caused by an intracellular  
44 protozoan parasite of the genus *Leishmania* [80]. A diverse and complex pathogen, *Leishmania* can be  
45 transmitted to humans through the bite of one of at least 20 different species of female sand flies of the  
46 subfamily Phlebotomus [17, 42]. Individuals living with Leishmaniasis may exhibit one of the four clinical  
47 syndromes; cutaneous, mucocutaneous, diffuse cutaneous, and visceral Leishmaniasis. [17, 77]. Visceral  
48 Leishmaniasis (VL, also known as Kala-Azar (KA) in Hindi) is considered the most severe form of the  
49 disease because death is inevitable if untreated. In fact, there are significant distinctions that have been  
50 observed even in the dynamics of VL from one region to another. VL is most often caused by species  
51 of the *Leishmania donovani* complex with *Leishmania donovani sensu stricto* circulating in the Indian  
52 subcontinent, *Leishmania donovani sensu lato* in East Africa, *Leishmania infantum* primarily found  
53 around the Mediterranean, in the Middle East, and rest of the Africa and Asia and *Leishmania chagasi*  
54 in the Americas [70]. There are marked differences between parasite species infections, for example, in  
55 terms of epidemiology, clinical features and responses to treatment.

56 **Epidemiology of VL:** *Leishmania donovani* (*L. donovani*) infects VL in most affected regions, with  
57 each year there is an estimated 500,000 new cases and approximately 50,000 recorded deaths worldwide  
58 [19]. Researchers estimate that roughly 12 million people are infected with *Leishmania* parasites, at a  
59 given time, among the 350 million individuals at risk [4, 61]. However, these statistics might be changing  
60 with recent WHO's efforts in eliminating VL from some parts of the world. VL is endemic in at least  
61 88 tropical and subtropical countries around the world with more than 90% of new cases generated in  
62 Bangladesh, Brazil, India, Nepal, and Sudan [32, 74]. In 2010, the state of Bihar in India reported an  
63 average of 270,000 new cases per year with an incidence rate of 21 cases per 1000 [42]. Twenty one  
64 districts out of Bihar's 38 districts are most affected from VL. The most recent (2014) report estimates  
65 that there are between 200,000 and 400,000 annual cases of VL in the five most affected countries, with  
66 India supporting between 146,700 to 282,000 cases per year and Sudan between 15,700 and 30,300 cases  
67 per year [9]. In Sudan, VL is endemic in southern, central, and eastern parts of the country, with most  
68 cases being reported from state of Gedaref (near the Ethiopian border) [49]. VL primarily affects low  
69 socio-economic and marginalized communities [57]. Geographic hot spots for infection are characterized  
70 by factors that include the average length of the sand flies life cycle, the abundance of parasite reservoirs,  
71 and human behaviors to infection [32, 74]. In this study, we aim to identify factors associated with VL  
72 burden in the two most affected countries in the world, India and Sudan.

73 **Risk Factors of VL in India and Sudan:** In India, the sand fly species *Phlebotomus Argentipes*  
74 is primarily responsible for transmitting the *L. donovani* parasite [67]. In Indian state of Bihar, annual  
75 patterns of VL incidence are assumed to be driven by ecological and social factors including distinct  
76 seasonality in sand fly population, lack of health care resources, extreme poverty, frequent flooding  
77 resulting in food shortages, and malnutrition [6, 57]. In Sudan, *Phlebotomus Orientalis* is the dominant  
78 sandfly vector associated with anthroponotic *L. donovani* transmission. [28, 31, 38, 39, 72, 86]. Typically,  
79 *P. Orientalis* is considered a forest species and its abundance is frequently associated with the presence  
80 of the savanna woodland tree species *Acacia Seyal* and *Balanites aegyptiaca* and deeply cracked vertisols  
81 (black cotton soil) [28, 29]. Primary risk factors for VL infection in Sudan include genetic factors (e.g.,  
82 some indigenous individuals may be more susceptible [6]), age, ethnicity, the consequences of poverty,  
83 movements of people facing civil war, and political instability which is accompanied by labour migrations  
84 for economic security reasons [6, 15, 68].

85 **Interventions in India and Sudan:** In Bihar, where 90% of India's VL cases occur, aggressive  
86 attempts at improving vector control programs via the distribution of insecticide-treated bed nets and  
87 insecticide spraying are being carried out [6]. India's Kala-azar Elimination Programs (KAEP) aims  
88 at reducing VL morbidity are tied into government-funded VL diagnosis and drug treatment programs.  
89 Pentavalent antimonial drugs, wherever it is effective, purchased by the public sector are barely sufficient  
90 to cover half of the infected patients [5, 57]. Limited drug availability and drug resistance are growing

91 problems in East Africa, particularly in Sudan, where antimonials are still the primary method of VL  
92 medical treatment. The poor must travel long distances to gain access to drugs and, consequently, the  
93 effectiveness of intervention policies are limited. Infected Sudanese often must wait extended periods of  
94 time before receiving minimal medical care [62].

95 **VL Mathematical Modeling Studies:** In 1988, Dye and Wolpert introduced what it appears to  
96 be the first Anthroponotic VL deterministic model for capturing the temporal dynamics of this disease.  
97 Their model was used to explain the observed VL inter-epidemic periods between 1875 and 1950 in  
98 Assam, India. Following this work, Dye, C. (1992, 1996) assessed the impact of control measures on VL  
99 patterns in endemic areas using appropriately modified models [23–25]. These studies concluded that  
100 dramatic upswing in VL cases in the past may be attributed to “intrinsic” factors related primarily to  
101 disease epidemiology in humans and vectors and not to “extrinsic” processes. Mathematical models are  
102 typically developed to capture VL transmission dynamics in a population. Using such model, a threshold  
103 quantity for infection, the reproductive number ( $\mathcal{R}_H$ ), is often computed for understanding the dynamics  
104 of the disease.  $\mathcal{R}_H$  is used to measure the disease’s ability to colonize a naive population or to identify  
105 the degree of endemicity in the presence of intervention. In general, model analysis suggests disease  
106 persistence when  $\mathcal{R}_H > 1$  and eventual disease extinction when  $\mathcal{R}_H < 1$  [84].

107 **Focus of this Study:** In the hyper-endemic regions of India and Sudan, it is believed that  $\mathcal{R}_H^i(\theta_h) >$   
108  $\mathcal{R}_H^s(\theta_h) > 1$ , where  $\mathcal{R}_H^i(\theta_h)$ , the control reproductive number, for India is greater than  $\mathcal{R}_H^s(\theta_h)$  of Sudan  
109 at their respective rate of treatment,  $\theta_h$ . This modeling study focuses exclusively on the transmission  
110 dynamics and control of VL in India and Sudan while proving or refuting the belief on differences in their  
111 estimated reproduction numbers. Since VL is hyper-endemic in these regions for long time, a model with  
112 established treatment regimes is considered the “status quo” an important assumption, since untreated  
113 individuals die relatively quickly. Parameters (transmission rates, death rates, etc.) are estimated us-  
114 ing novel simple methods where current treatment ( $\theta_h$ ) is always present. Consequently, the process of  
115 invasion (ability of VL to invade a population) is addressed under current treatment policies. There-  
116 fore, the reproductive number includes treatment rate,  $\theta_h$ , as part of the initial set-up where detailed  
117 infection data is absent (technically it cannot be called the “basic” reproductive number). A comparative  
118 study of the VL situation in India and Sudan is carried out via a model derived metrics parameterized  
119 using estimates derived from published clinical trials data and published national reports. Uncertainty  
120 and sensitivity analyses are then carried out to identify key risk factors and use them to evaluate the  
121 effectiveness of intervention programs in the two “worst-affected” VL-regions of the world. In summary,  
122 the goals of this study are: (i) identify relevant data from field/clinical studies needed to estimate model  
123 parameters of a dynamic model, (ii) develop procedures to estimate distributions of quantities for which  
124 data are unavailable, (iii) evaluate risk associated with VL in India and Sudan, and (iv) compare and  
125 contrast the risk factors between India and Sudan. The details of the analysis are depicted in the Figure  
126 1.

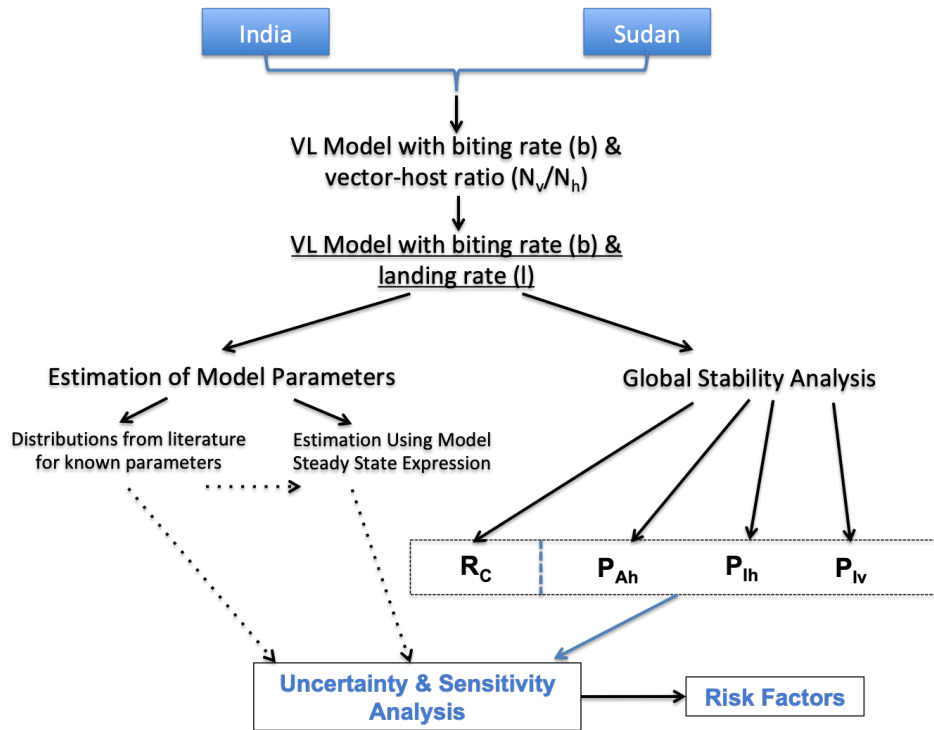

Figure 1. Flow chart representing steps in the analysis.

## 127 2 Methods

### 128 2.1 Model formulation and assumptions

129 The *Leishmania donovani* transmission cycle is anthroponotic and takes place from human to human  
 130 via the bite of an infective female phlebotomine Sandfly. A mathematical model of the transmission  
 131 dynamics of VL infection is used here where the interacting host ( $N_h(t)$ ) and vector ( $N_v(t)$ ) populations  
 132 are assumed to mix homogeneously. The flow chart representing disease progression and transmission  
 133 is shown in Figure 2. The human population is subdivided into susceptible individuals ( $S_h(t)$ ), asymp-  
 134 tomatic individuals ( $A_h(t)$ ), infectious individuals with clinical VL infection ( $I_h(t)$ ), individuals under  
 135 treatment ( $T_h(t)$ ), and recovered-immune to reinfection individuals ( $R_h(t)$ );  $N_h \equiv S_h + A_h + I_h + T_h + R_h$ .  
 136 The sandfly population is assumed to be divided into susceptible ( $S_v(t)$ ) and infectious ( $I_v(t)$ ) vectors  
 137 with  $N_v \equiv S_v + I_v$ .

138 The model system is given as:

$$\begin{aligned}
 \frac{dS_h}{dt} &= \Lambda_h - \lambda_{vh}S_h - \mu_h S_h \\
 \frac{dA_h}{dt} &= \lambda_{vh}S_h - (\phi_h + \mu_h) A_h \\
 \frac{dI_h}{dt} &= \phi_h A_h - (\theta_h + \mu_h) I_h \\
 \frac{dT_h}{dt} &= \theta_h I_h - (\gamma_h + \mu_h) T_h \\
 \frac{dR_h}{dt} &= \gamma_h T_h - \mu_h R_h
 \end{aligned} \quad (1)$$

$$\begin{aligned}
 \frac{dS_v}{dt} &= \Lambda_v - \lambda_{hv}S_v - \mu_v S_v \\
 \frac{dI_v}{dt} &= \lambda_{hv}S_v - \mu_v I_v
 \end{aligned} \quad (2)$$

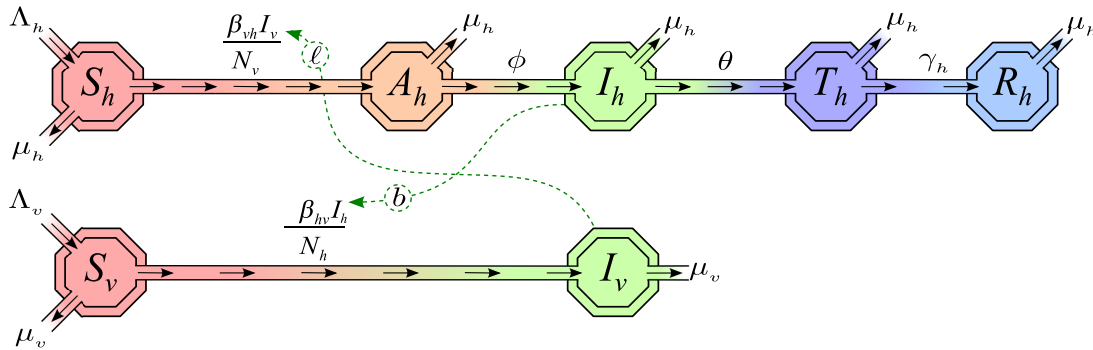

**Figure 2.** A schematic representation of the mathematical modeling framework consisting of interacting human ( $N_h$ ) and Sandfly ( $N_v$ ) populations. Arrows represent transition between different infection stages in the two populations.

| Parameter    | Definition                                                              | Units                 |
|--------------|-------------------------------------------------------------------------|-----------------------|
| $b$          | Average number of bites per sandfly                                     | $day^{-1}$            |
| $\beta_{vh}$ | Transmission probability when infected sandflies bite susceptible human | Dimensionless         |
| $\beta_{hv}$ | Transmission probability when susceptible Sandfly bite infected humans  | Dimensionless         |
| $\gamma_h$   | Per capita treatment-induced recovery rate from VL infection            | $day^{-1}$            |
| $\Lambda_h$  | Human recruitment rate                                                  | $N_h \times day^{-1}$ |
| $\Lambda_v$  | sandflies daily rate of becoming adults                                 | $N_v \times day^{-1}$ |
| $\mu_h$      | Human daily per capita natural mortality rate                           | $day^{-1}$            |
| $\mu_v$      | Adult Sandfly daily per capita mortality rate                           | $day^{-1}$            |
| $\phi_h$     | Per capita development rate of clinical symptoms of VL infection        | $day^{-1}$            |
| $\theta_h$   | Per capita treatment rate of infectious humans                          | $day^{-1}$            |
| $m_{v:h}$    | Ratio of sandflies to humans ( $N_v^*/N_h^*$ )                          | Dimensionless         |
| $\ell$       | sandfly landing rate on a human                                         | $day^{-1}$            |

**Table 1.** The parameters for the VL model and their dimensions

Disease-induced mortality is not included because, due to institutionalized treatment, deaths from VL are negligible. For simplicity, the human population is assumed to be constant.  $\Lambda_h$  denotes the recruitment rate into the susceptible population, and  $\mu_h$  denotes the per-capita death rate. Because  $N_h$  approaches  $\frac{\Lambda_h}{\mu_h}$  when  $t$  approaches  $\infty$ , we assume, without loss of generality, that  $N_h = \frac{\Lambda_h}{\mu_h}$  [16]. A susceptible individual acquires the *L. Donovanii* parasite following an effective contact with an infectious sandfly. The rate  $\lambda_{vh}$ , the force of infection on humans, is given by

$$\lambda_{vh} = b\beta_{vh} \frac{N_v}{N_h} \frac{I_v}{N_v} = b\beta_{vh} m_{v:h} \frac{I_v}{N_v}, \quad (3)$$

where the right-hand expression (Equation 3) is given by the product of the per-vector daily biting rate of sandflies ( $b$ ), the VL infection transmission probability, given a bite from an infected sandfly to human ( $\beta_{vh}$ ), the average number of sandflies per humans  $m_{v:h}$ , and the proportion of infectious sandflies in the vector population ( $I_v/N_v$ ). It is assumed that all newly VL-infected humans go through an asymptomatic (symptomless) stage ( $A_h$ ). After an asymptomatic period of several months, humans develop clinical symptoms at the per capita rate  $\phi_h$ , moving to the infectious class  $I_h$ . During the infectious period, humans will seek VL treatment at the per capita rate  $\theta_h$ , proper treatment leads to recovery at the per capita rate  $\gamma_h$  (recovered individuals gain lifelong immunity). Newly emerging adult female sandflies are recruited into the susceptible population at rate  $\Lambda_v$  and die at the per-capita rate  $\mu_v$ . The sandfly

population is assumed constant. A susceptible sandfly is infected following an effective contact with infectious humans at the per capita rate  $\lambda_{hv}$  (force of infection on sandflies). The rate  $\lambda_{hv}$  is given by

$$\lambda_{hv} = b\beta_{hv}\frac{I_h}{N_h}, \quad (4)$$

139 where the right-hand side is the product of: the per vector daily biting rate ( $b$ ); the probability that  
140 susceptible sandflies acquire the *Leishmania* parasite while feeding on a VL-infected individuals ( $\beta_{hv}$ );  
141 the proportion of VL infectious humans in the human population ( $I_h/N_h$ ). It is also assumed that the  
142 *Leishmania* parasite has no impact on an infected sandfly's lifespan; the sandflies' natural mortality per-  
143 capita rate is the same for infected and uninfected, namely,  $\mu_v$ . See Appendix B for complete model  
144 derivation.

## 145 2.2 Biting rates

146 Interactions between vector biting behavior and uneven pathogen transmission potential between hosts  
147 may lead to difficulty in controlling infection. How vector species respond to availability of hosts is  
148 highly variable and has fostered considerable interest among vector borne disease modelers for decades.  
149 The proportion of blood-meals taken by vectors from the host species of interest is generally assumed to  
150 increase directly with increasing human availability and changing levels of vector density. Hence, vector  
151 biting can play a significant role in the transmission process [88]. The biting rate of sandflies is typically  
152 a function of ambient air temperatures, humidity, wind speed, vector density and local habitat. There  
153 remains a couple of challenges in effectively using biting rates, namely, which is a proper functional  
154 response to capture biting rates in the model and how to measure it precisely from the field data.

155 To effectively use models to make reasonable definitions, models must be carefully parameterized and  
156 validated with epidemiological and entomological data. On the other hand, researchers have modeled  
157 biting rate in different ways but realistically the biting rate may vary according to the abundance of  
158 hosts and to vector preference [87]. In this study, we suggest alternative forms of transmission terms  
159 as well as use distinct data sets to estimate parameters of the two different terms (vector-to-host and  
160 host-to-vector terms).

## 161 2.3 Incidence as a Function of the Landing Rates

162 This section first provides a careful derivation of incidence rates expression as a function of landing and  
163 biting rates and then use landing rate data to estimate the transmission probabilities from sandflies to  
164 humans ( $\beta_{vh}$ ) and humans to sandflies ( $\beta_{hv}$ ).

The human incidence rate (Equation (3)) is a function of the average rate of interactions between vectors and humans, which in turn is directly proportional to the proportion of infectious sandflies ( $\frac{I_v^*}{N_v^*}$ ). Let  $b$  denote the average number of bites per sandfly per unit time and  $\rho$  the average number of bites received per human per unit time. *Assuming that all sandfly bites are to humans only, we must have that the total number of bites made by all sandflies per unit of time ( $bN_v^*$ ) equals the total number of bites received by all human hosts per unit of time ( $\rho N_h^*$ ).* Thus, we have that

$$bN_v^* = \rho N_h^* \Rightarrow \rho = b\frac{N_v^*}{N_h^*} = b m_{v:h}, \quad (\text{constant by assumption}) \quad (5)$$

The assumption that  $\rho$  is constant is customary in the literature although there are some studies where the host vector ratio is assumed not constant over time [85]. *We further assume that the average number of bites received by a human per unit time is proportional to the number of sandflies landing on an individual per unit time, that is,*

$$\rho \propto \ell. \quad (6)$$



Hence, the total number of effective landings on all humans from all sandflies per unit time is

$$\ell N_h \frac{S_v}{N_v} + \ell N_h \frac{I_v}{N_v}, \quad (7)$$

165 where the first (second) term of (7) accounts for the total number of effective landings on all humans from  
 166 all susceptible (infected) sandflies per unit time. That is, the total effective landing/feeding of vectors on  
 167 humans is a function of the total vector population, which includes both susceptible and infected vectors.  
 168 In epidemiology, of importance are only the two cases when landing occurs from a susceptible sandfly  
 169 on an infected human and from an infected sandfly on a susceptible human, as they are the cases where  
 170 landing results in transmission of VL from humans to sandflies and vice versa. In other words,  $\ell N_h$  is  
 171 the total number of effective landings per unit time, while  $\ell N_h \frac{I_v}{N_v}$  is the proportion of bites that result  
 172 in infecting new hosts. Therefore,  $\ell N_h \frac{S_v}{N_v}$  is the proportion of bites that get “wasted” since they cannot  
 173 generate infections.

If  $\beta_{vh}$  is the per-person transmission efficiency (that is, probability that infection is successfully transmitted from vector to human given an infected bite), then the rate at which VL is transmitted to humans is

$$\lambda_{vh} = b m_{v:h} \beta_{vh} \frac{I_v}{N_v} \approx \rho \beta_{vh} \frac{I_v}{N_v} \approx \ell \beta_{vh} \frac{I_v}{N_v} \quad (8)$$

174 using Equations (5) and (6).

Similarly, we can derive the infection rate in the vector population generated by infected humans. If  $\bar{\ell}$  accounts for the average number of times a sandfly lands on humans per unit time, then the total number of effective landings by all sandflies on all humans is

$$\bar{\ell} N_v \frac{S_h}{N_h} + \bar{\ell} N_v \frac{A_h}{N_h} + \bar{\ell} N_v \frac{I_h}{N_h} + \bar{\ell} N_v \frac{T_h}{N_h} + \bar{\ell} N_v \frac{R_h}{N_h}.$$

It should be noted that the total  $\ell N_h = \bar{\ell} N_v$  and that, while accounting for new incidences in sandflies, we are interested in landings occurring from susceptible sandflies on infected humans only. Hence, the term

$$\bar{\ell} N_v \frac{I_h}{N_h} = \ell N_h \frac{I_h}{N_h} = \ell I_h$$

is the one that plays a role in accounting for new sandflies incidences, while the remaining terms aren't. If we let  $\beta_{hv}$  be the per-person transmission efficiency from human to vector (i.e., transmission probability per bite on infectious humans that leads to infection in a susceptible sandfly), then the total number of sandflies who acquire infection while effectively landing on infected humans per unit time is

$$\lambda_{hv} S_v = \beta_{hv} \ell I_h \frac{S_v}{N_v} = \beta_{hv} \ell \frac{I_h}{N_h} \frac{1}{m_{v:h}} S_v \approx \beta_{hv} b \frac{I_h}{N_h} S_v \quad (9)$$

175 using Equations (5) and (6).

### 176 3 Analysis

177 In this section, we derive from the model an expression for the average number of secondary infections  
 178 generated by an infected individual (referred here as the control reproduction number), as well as ex-  
 179 pressions for the prevalence of different types of the populations. We also discuss the procedures used for  
 180 estimating model parameters.

### 181 3.1 Stability Analysis

182 The analysis of Model (1)–(2) shows that it has two equilibriums, namely, the Disease Free Equilibrium  
183 (DFE) and Endemic Equilibrium (EE). The existence and stability of the equilibriums depends on the  
184 threshold ratio, the reproduction number, first introduced by Sir Ronald A. Ross in his 1911 seminal  
185 work on malaria [41] and it provides a measure of the risk posed by an invading disease in a population  
186 without any intervention for the disease. The control reproduction number,  $\mathcal{R}_C$ , is a similar ratio defined  
187 as the number of secondary infections caused by a single infective introduced in a primarily susceptible  
188 population (i.e.,  $N \approx S_0$ ) but in the presence of interventions [12, 20, 53, 84].

Using our model, we compute  $\mathcal{R}_C$  using the next generation operator approach [12, 13, 84], a process that requires the computation of the matrix of new infection terms,  $\mathbf{F}$ , and the matrix of transition between compartments,  $\mathbf{V}$ . The  $\mathcal{R}_C$  is the spectral radius of the next generation matrix,  $\rho(\mathbf{F}\mathbf{V}^{-1})$  (see section B.1 for derivation), in the presence of treatment program (where the treatment rate is  $\theta_h$ ) and is given by

$$\mathcal{R}_C(\theta_h) = \sqrt{\left(\frac{\phi_h}{(\mu_h + \phi_h)} \cdot \frac{\beta_{vh}\ell}{(\mu_h + \theta_h)}\right) \cdot \left(\frac{b\beta_{hv}}{\mu_v}\right)} \quad (10)$$

where  $\ell$  is the landing rate on a human,  $b$  is the biting rate per sandfly, and  $\beta_{vh}$  the number of infections in humans generated by one infected vector. The expression  $\frac{\phi_h}{(\mu_h + \phi_h)} \cdot \frac{\beta_{vh}\ell}{(\mu_h + \theta_h)}$  is the average number of new cases vectors generated by one infected human and  $\frac{b\beta_{hv}}{\mu_v}$  represent average number of new cases in humans produced by one infected vector. Hence,  $\mathcal{R}_C(\theta_h)$  is given by the geometric mean of two sub “reproduction” numbers

$$\mathcal{R}^{hv}(\theta_h) = \frac{\phi_h}{(\phi_h + \mu_h)} \cdot \frac{\ell\beta_{vh}}{(\theta_h + \mu_h)} \quad \text{and} \quad \mathcal{R}^{vh} = \frac{b\beta_{hv}}{\mu_v} \quad (11)$$

189 where  $\mathcal{R}^{hv}(\theta_h)$  is interpreted as the number of secondary infections caused in humans through a bite of a  
190 single typical infectious sand fly into an entirely susceptible host population in the presence of treatment  
191 program while  $\mathcal{R}^{vh}$  denotes the number of secondary infections in female sandflies caused by one newly  
192 introduced infected human.

193 *Remark 3.1.* The DFE of Model (1–2) always exist and is globally asymptotically stable (LAS) if  
194  $\mathcal{R}_C(\theta_h) < 1$  and unstable if  $\mathcal{R}_C(\theta_h) > 1$ . (see Appendix B.4 for proof)

195 *Remark 3.2.* The EE exists and is globally stable only when  $\mathcal{R}_C(\theta_h) > 1$  (see Section B.4 for proof).

### 196 3.2 Robustness Analysis

197 VL has received comparatively much less attention by researchers and policy makers as compared to  
198 many other tropical diseases and hence, is classified as one of the neglected diseases by WHO. There are  
199 limited number of studies that collect data to study VL patterns and even fewer studies that use such  
200 data in a dynamical model for evaluating control programs. In this research, we carry out a thorough  
201 literature review to identify what data is available and what is missing that may be needed to understand  
202 comprehensively VL dynamics for two most affected countries in the world.

203 Since  $\mathcal{R}_C$  plays a key role in the transmission dynamics of VL and parameters are often not precisely  
204 measured in India and Sudan, studying parameter sensitivity of the model outputs including on  $\mathcal{R}_C$   
205 becomes important if we wish to identify the pressure points of the system. Uncertainty (UA) and  
206 sensitivity (SA) analyses are used here to assess the robustness in the model results as a function of  
207 uncertainty in the estimated model parameters from available data. The analyses rely on the Latin  
208 Hypercube Sampling (LHS) and require the computation of the Partial Rank Correlation Coefficient  
209 (PRCC), a sensitivity index with respect to each of the model parameters [11, 54, 55]. The LHS scheme  
210 includes the generation of a stratified random sampling that ensures a systematic optimal exploration  
211 of the feasible parameter space. In the sampling, an input parameter  $X$  with a pre-defined probability



212 distribution function (PDF) is divided into  $N$  equiprobable subintervals. From each subintervals, a value  
213 is sampled. The  $N$  values for this parameter are randomly paired with the the corresponding  $N$  values  
214 of other parameters generated in the same way. The PRCCs is used to measure the degree of linear  
215 association between a model output and a parameter from a set of parameters, after influence of linearity  
216 from all other parameters of the set had been eliminated [54]. The calculated PRCCs and corresponding  
217 p-values value are used to rank sensitivity of the parameters to the output variable. The PRCC value of  
218 each input parameter is considered statistically significant, with  $p$ -value < 0.05, if  $PRCC > |0.3|$ .

219 Multiple data sources and reports were considered to obtain point estimates for each of the model  
220 parameters for which precise value was not obtained. Using the point estimates, a theoretical distri-  
221 bution is fitted to available data for corresponding parameter and random samples were generated via  
222 distribution. We assess the impact of variation in model parameters on estimates, as well as the level  
223 of influence, of each, on estimates of  $\mathcal{R}_C$  and the country specific prevalence. We develop approaches  
224 using our dynamic model to estimate country specific (India and Sudan) parameters for which data was  
225 unavailable and performed parametric uncertainty and sensitivity analysis on model based metrics that  
226 defines risk based on four different definitions: (i)  $\mathcal{R}_C$ , (ii) prevalence of asymptomatic humans, (iii)  
227 prevalence of symptomatic humans, or (iv) prevalence of infectious vectors.

## 228 4 Results

### 229 4.1 Parameter Estimation

230 Model parameter estimates, and their ranges, and distributions were obtained for India and Sudan using  
231 prevalence data, published literature, and methodology developed in sections below [22, 27, 51, 77, 86]. In  
232 the case of the species of *Phlebotomus sandflies*, most of the parameter estimates were taken from data  
233 collected via field studies in parasitology and ecology literature [22, 27, 51]. We provide details of all pa-  
234 rameter estimates in Section C of Appendix and a summarize them in Table 2. We estimated parameters,  
235 for which precise data could not be obtained for India and Sudan, via our two developed approaches. In  
236 the next Section 4.1.2 we give a detailed discussion and procedure for estimating transmission probabilities  
237 of the model for both countries.

#### 238 4.1.1 Landing rate

239 The nocturnal activities of various sandfly species start at around 6:00 pm – 9:00 pm, peaks between  
240 the hours of 11:00 pm – 1:00 am and ends between the hours of 3:00 pm and 6:00 am. A rapid rise  
241 to a maximum pick and then a sharp decline observed in data from various field studies suggest the  
242 probability distribution for biting and landing rate would best be fitted with a triangular distribution.  
243 However, most data represented more closely to landing rates and hence, in this section we show the fits  
244 of landing rate distribution. From the fitted data for each respective countries, the shape parameters  
245 (min, max, and mode) for the triangular distribution for landing rate was estimated from the sandflies  
246 trap data (see Figures 3a and 3b for *P. Argentines* and Figures 4a and 4b for *P. Orientalis*).

#### 247 4.1.2 Approaches for Estimating the Transmission Probabilities

Lack of active surveillance, effective case identification and case management results in under-reporting of cases and uncertainties in epidemiological parameter. A survey of the literature on mathematical studies on VL dynamics revealed that estimates obtained for the transmission probabilities for VL are often based on corresponding estimates for malaria, dengue and other well-studied vector-borne diseases. Consequently, borrowing of parameter estimates from other established vector-borne models can contribute epistemic uncertainties in the epidemic threshold and underestimate or overestimate model predictions. To understand the impact of these uncertainties on parameter estimates, we used ranges for parameters

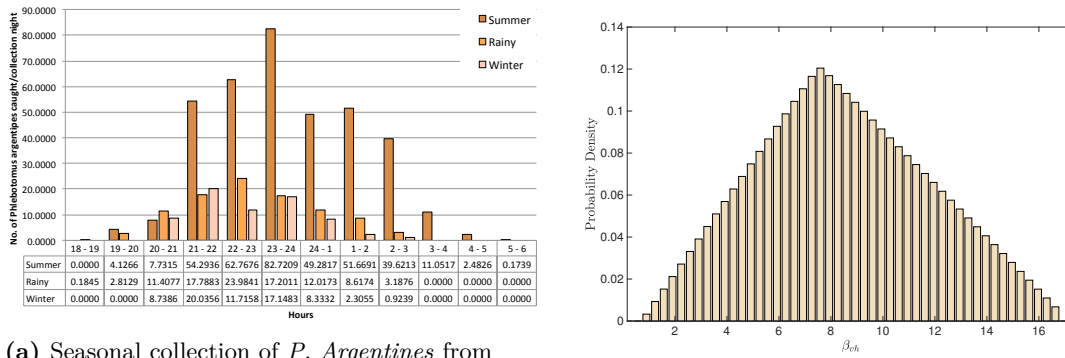

(a) Seasonal collection of *P. Argentines* from sampling sites in Bihar, India; female sandflies per (b) Estimated distribution of landing rate for house per night using CDC Light Traps from [45] India using collection data

**Figure 3.** Collected data of *P. Argentines* was first averaged over seasons and then fitted to the triangular distribution to estimate parameters of the distribution representing landing rate. The mean and 95% Confidence Interval for landing rate distribution are given in Table 2.

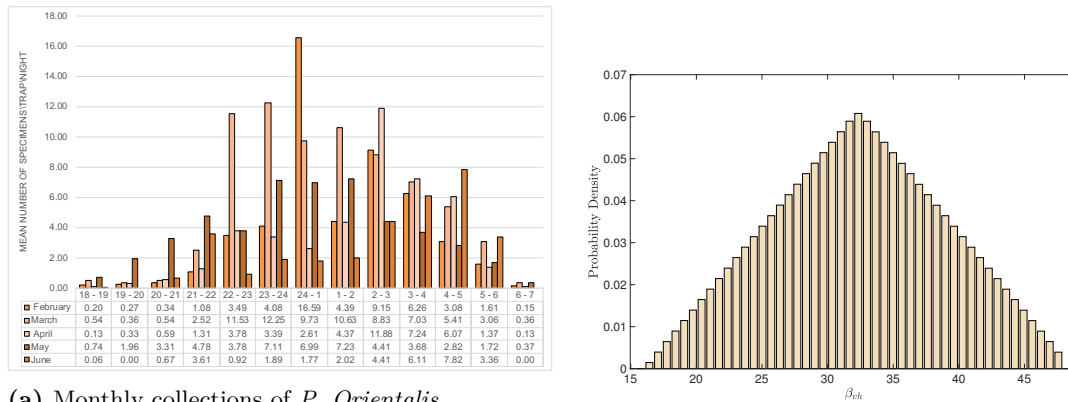

(a) Monthly collections of *P. Orientalis* specimens/trap/night from sampling sites in neighboring country of Sudan, Ethiopia [33] (b) Distribution estimated using trap data from northern Ethiopia

**Figure 4.** Collected data of *P. Orientalis* was first averaged over months and then fitted to the triangular distribution to estimate parameters of the distribution representing landing rate. The mean and 95% Confidence Interval for landing rate distribution are given in Table 2.

for which we can obtain data with relatively high certainty and mathematical methods to estimate the parameters representing transmission probabilities required in our model. Two novel approaches, that uses endemic prevalence from the model, were designed to estimate the transmission probabilities as described in the next two sub-sections. Note, the unique endemic equilibrium of the model is stable (as shown in the Section 3) and is given by

$$\begin{aligned}
 E^* &= (S_h^*, A_h^*, I_h^*, T_h^*, R_h^*, S_v^*, I_v^*) \\
 &= \left( \frac{\Lambda_h (\mathcal{R}^2 + \beta_{vh}) \beta_{vh}}{\mu_h \mathcal{R}_C^2 (\ell \beta_{vh} + \mu_h)}, \frac{\Lambda_h (\mathcal{R}_C^2 - 1) G_2 \mu_v}{b \phi_h (\ell \beta_{vh} + \mu_h) \beta_{hv}}, \frac{A_h^* \phi_h}{G_2}, \frac{A_h^* \phi_h \theta_h}{G_2 G_3}, \frac{A_h^* \phi_h \theta_h \gamma_h}{G_2 G_3 \mu_h}, \frac{\Lambda_h \Lambda_v}{S_h^* \mu_h \mu_v \mathcal{R}_C^2}, \frac{\mu_h \beta_{hv} b I_h^* S_v^*}{\mu_v \Lambda_h} \right)
 \end{aligned}$$

248 where  $G_1 = \phi_h + \mu_h$ ,  $G_2 = \theta_h + \mu_h$ , and  $G_3 = \gamma_h + \mu_h$ . The explicit expressions of the infected components  
 249 of the endemic equilibrium are

$$A_h^* = \frac{bl \Lambda_h \Lambda_v \beta_{hv} \beta_{vh} \phi_h - G_1 G_2 N_h N_v \mu_h \mu_v^2}{\beta_{hv} \phi_h (\ell \Lambda_v \beta_{vh} + N_v \mu_h \mu_v)} G_1 b \geq 0 \quad (12)$$

$$I_h^* = \frac{bl \Lambda_h \Lambda_v \beta_{hv} \beta_{vh} \phi_h - G_1 G_2 N_h N_v \mu_h \mu_v^2}{\beta_{hv} (\ell \Lambda_v \beta_{vh} + N_v \mu_h \mu_v)} G_2 G_1 b \geq 0 \quad (13)$$

$$I_v^* = \frac{bl \Lambda_h \Lambda_v \beta_{hv} \beta_{vh} \phi_h - G_1 G_2 N_h N_v \mu_h \mu_v^2}{\ell \beta_{vh} (b \Lambda_h \beta_{hv} \phi_h + G_1 G_2 N_h \mu_v)} \mu_v \geq 0 \quad (14)$$

250 Since VL is endemic in both India and Sudan, we use these expression to obtain prevalences and thereby  
 251 use them to estimate transmission probabilities (i.e.  $\beta_{vh}, \beta_{vh}$ ). We assume  $\Lambda_h = \mu_h N_h$  and  $\Lambda_v = \mu_v N_v$   
 252 and hence, the host and vector populations becomes constant. The prevalences in humans and sandflies  
 253 populations are given by

$$254 \quad \mathcal{P}_{I_h} = \frac{I_h^*}{N_h^*} = \frac{(\ell b \varphi \beta_{hv} \beta_{vh} - G_1 G_2 \mu_v) \mu_h}{\beta_{hv} (\ell \beta_{vh} + \mu_h) G_2 G_1 b} \quad (15a) \quad \mathcal{P}_{I_v} = \frac{I_v^*}{N_v^*} = \frac{(\ell b \varphi \beta_{hv} \beta_{vh} - G_1 G_2 \mu_v) \mu_h}{\ell \beta_{vh} (b \varphi \beta_{hv} \mu_h + G_1 G_2 \mu_v)} \quad (15b)$$

256 **Approach 1:** Fixing all model parameters for which data was available and assuming that humans and  
 257 vectors prevalences are known, we obtain simultaneous equations in  $\beta_{hv}$  and  $\beta_{vh}$  using Equations (15a)  
 258 and (15b). Solving the simultaneous equations, we get

$$259 \quad \beta_{hv} = \frac{\mu_v \mathcal{P}_{I_v}}{b \mathcal{P}_{I_h} (1 - \mathcal{P}_{I_v})} \quad (16a) \quad \beta_{vh} = \frac{G_1 G_2 \mathcal{P}_{I_h} \mu_h}{\ell \mathcal{P}_{I_v} (\phi \mu_h - G_1 G_2 \mathcal{P}_{I_h})} \quad (16b)$$

260 The equations (16a) and (16b) along with the estimates of other model parameters and known sample  
 261 host and vector prevalences are used to obtain estimates of the transmission probabilities. The estimated  
 262 distributions using the this approach are given in Figure 5.

263 **Approach 2:** In this approach, we rely on estimates of  $\mathcal{R}_C$  from modeling studies in literature to  
 264 estimate the transmission probabilities for the two countries. Using Equation (10), the expressions (15a)  
 265 and (15b) for the prevalences can be rewritten in terms of  $\mathcal{R}_C$  as follows:

$$266 \quad \mathcal{P}_{I_h} = \frac{(\mathcal{R}_C^2 - 1) \mu_v \mu_h}{\beta_{hv} (\ell \beta_{vh} + \mu_h) b} \quad (17a) \quad \mathcal{P}_{I_v} = \frac{(\mathcal{R}_C^2 - 1) \mu_h}{\beta_{vh} (\mathcal{R}_C^2 + \ell)} \quad (17b)$$

267 Isolating  $\beta_{vh}$  and  $\beta_{hv}$  from (17a) and (17b) we obtain,

$$268 \quad \beta_{hv} = \frac{\mu_v \mathcal{P}_{I_v} (\mathcal{R}_C - 1) (\mathcal{R}_C + 1) (\mathcal{R}_C^2 + \ell)}{\mathcal{P}_{I_h} ((\mathcal{R}_C^2 + \mathcal{P}_{I_h} - 1) \ell + \mathcal{P}_{I_v} \mathcal{R}_C^2) b} \quad (18a) \quad \beta_{vh} = \frac{(\mathcal{R}_C^2 - 1) \mu_h}{\mathcal{P}_{I_v} (\mathcal{R}_C^2 + \ell)} \quad (18b)$$

270 The estimated distributions using the this approach are given in Figure 5.

## 271 4.2 Parameter uncertainty and sensitivity analyses

272 Parameter uncertainty and sensitivity analyses are performed on two different quantities: the reproduc-  
 273 tion number ( $\mathcal{R}_{C_I}$  for India and  $\mathcal{R}_{C_S}$  for Sudan) and the Prevalence of the infected populations ( $\mathcal{P}_{A_h}$ ,  
 274  $\mathcal{P}_{I_h}$ , and  $\mathcal{P}_{I_v}$ ). These analyses are used to assess which of the eight input parameters ( $b, \ell, \beta_{hv}, \beta_{vh}, \mu_h,$   
 275  $\mu_v, \phi_h,$  and  $\theta_h$ ) are most significant to estimating disease patterns.

### 276 4.2.1 On $\mathcal{R}_C$

277 Uncertainty and sensitivity analyses on the control reproduction number  $\mathcal{R}_C$  (the outcome variable) assess  
 278 critical parameters to disease dynamics. We fit a parametric probability density function (PDF) for each

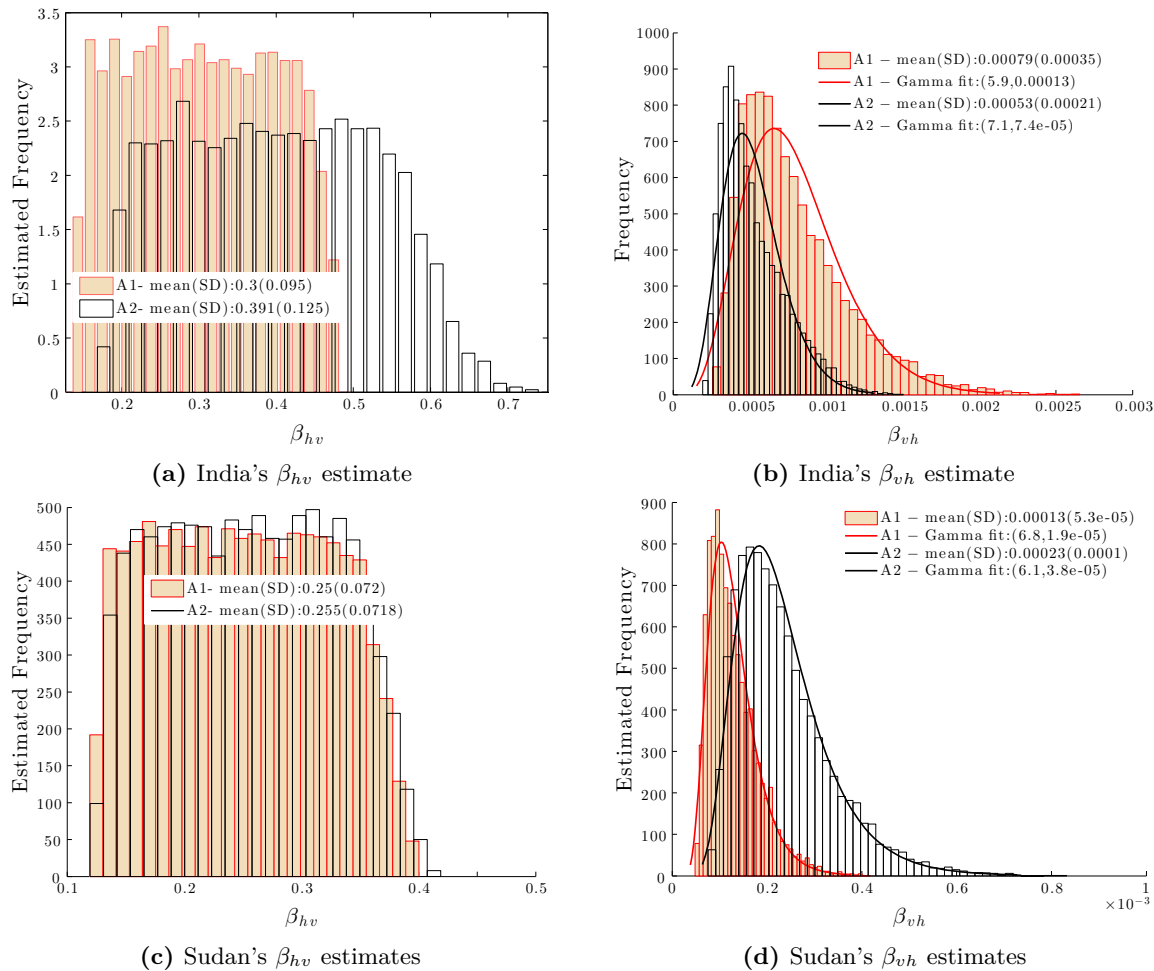

**Figure 5.** Estimated distribution of  $\beta_{vh}$  and  $\beta_{hv}$  for India (a–b) and Sudan (c–d), respectively. A1 (A2) represents the distribution obtained using Approach 1 (Approach 2). A visual comparison of the fitted gamma distribution together with the model obtained estimated transmission probabilities,  $\beta_{vh}$ .

279 of the eight parameters to respective available data. In the case of the parameters  $b$ ,  $\mu_v$ ,  $m_{h:v}$ ,  $\beta_{vh}$ ,  
 280  $\beta_{hv}$ ,  $\mu_h$ , and  $\mu_v$  a uniform distribution was generated since the minimum and maximum point estimates  
 281 were only found in the literature. The parameters,  $\phi_h$ , and  $\theta_h$  were assigned a gamma distribution as  
 282 estimated in previous study based on inverse problem approach (Mubayi et al. [57]). For each of the eight  
 283 parameters with assigned probability distributions, sample sizes of 10,000 values were randomly generated  
 284 over ten independent realizations. Using LHS technique, in each of the realizations we paired randomly  
 285 the first  $N$  samples of the first column (samples of first parameter) with  $N$  samples from the second  
 286 column (samples of second parameter). After all eight parameters were paired without replacement; an  
 287 LHS matrix was generated with rows and columns corresponding to parameters and entries of the LHS  
 288 samples. Each row of parameters in the LHS matrix were considered to be random inputs variables for  
 289 generating one value of  $\mathcal{R}_C$  using Equation (10). Thus,  $N \times p$  LHS matrix (where  $p$  represents number  
 290 of parameters on which  $\mathcal{R}_C$  depends) results in  $N$  samples for  $\mathcal{R}_C$  in each realization.

291 After 10 realizations, the mean ( $\mu$ ) of point estimates of  $\mathcal{R}_C$ , standard error ( $\sigma$ ) of  $\mathcal{R}_C$ , and the  
 292 probabilities that  $\mathcal{R}_C$  estimates fall below and above the threshold value one for India and Sudan were

293 collected (Table ??). The mean estimated value for  $\mathcal{R}_C$  for India was found to be approximately 2.11,  
294 which greater than the corresponding mean estimated value of 1.30 for Sudan. The fact that India has  
295 the highest estimated incidence in the world (146,700 to 282,800 per year) roughly twice of that in Sudan  
296 having the highest in Africa (15,700 to 30,300 per year) [5, 6], is not enough unless we are able to re-scale  
297 them appropriately, to make any conclusions on that largest differences in  $\mathcal{R}_C$ - values. These estimates  
298 of  $\mathcal{R}_C$  confirm the current VL status in India and Sudan. The difference in the magnitude of  $\mathcal{R}_C$  may be  
299 attributable to the fact that India carries a much greater burden of all new VL cases (almost more than  
300 50%) worldwide.

301 Statistical analysis on the differences in the means of  $\mathcal{R}_C$  for India and Sudan was carried out using  
302 a t-test with  $H_0 : M_I = M_S$  against  $H_1 : M_I \neq M_S$  where the mean of  $\mathcal{R}_C$  for India was denoted as  $M_I$   
303 and for Sudan  $M_S$ . The analysis suggested rejection of null hypothesis (Table 4), that is, the obtained  
304 point estimates of  $\mathcal{R}_C$  between India and Sudan are statistically different. Now that we have concluded  
305 that  $\mathcal{R}_C$  for India is indeed significantly higher than that the one for Sudan using model generated  $\mathcal{R}_C$ ,  
306 re-scaled by population size, we proceed to determine what are the parameters that if modified generates  
307 the larger change in  $\mathcal{R}_C$ .

308 The PRCCs were calculated for each country in order to quantify sensitivity of model parameters on  
309 the  $\mathcal{R}_C$  estimates. We observe the sign and the magnitude of the PRCC values for each parameter above  
310 the line  $y = \pm 0.3$  for each respective country.

#### 311 4.2.2 On endemic prevalences ( $\mathcal{P}_{A_h}$ , $\mathcal{P}_{I_h}$ , and $\mathcal{P}_{I_v}$ )

312 Parameter uncertainty and sensitivity analyses are also performed on the Prevalence of the infected  
313 populations ( $\mathcal{P}_{A_h}$ ,  $\mathcal{P}_{I_h}$ , and  $\mathcal{P}_{I_v}$ ). These analysis are used to assess which of the same eight input  
314 parameters ( $b$ ,  $\ell$ ,  $\beta_{hv}$ ,  $\beta_{vh}$ ,  $\mu_h$ ,  $\mu_v$ ,  $\phi_h$ , and  $\theta_h$ ) are most significant to estimating endemic prevalences.

315 As described in the Section 4.2.1 on  $\mathcal{R}_C$ , the similar sensitivity and uncertainty analysis procedure  
316 was carried out on the endemic prevalences for both the countries. However, higher number of samples  
317 (50,000) for each parameter were obtained. The first 10,000 sample-sets (out of the 50,000) that resulted  
318 in  $\mathcal{R}_C > 1$  (condition for existence of the endemic prevalence) were eventually used in the analysis. This  
319 is because that endemic equilibrium only exists and stable when  $\mathcal{R}_C > 1$ .

### 320 4.3 Assessment for India

#### 321 4.3.1 Uncertainty and Sensitivity Analysis on $\mathcal{R}_{C_I}$

322 The estimated distribution of  $\mathcal{R}_{C_I}$  from uncertainty analysis, is shown in Figure 7a. The mean estimate  
323 of  $\mathcal{R}_{C_I}$  for India is found to be 2.05 with a standard deviation of 1.09. The sensitivity analysis of  $\mathcal{R}_{C_I}$   
324 provides the ranking of parameters based on their influence on  $\mathcal{R}_{C_I}$  (Figure 7e). In decreasing order of  
325 influence, the parameter ranking was  $\theta_h$ , being the most sensitive parameter, followed by  $b$ ,  $\ell$ ,  $\beta_{vh}$ ,  $\beta_{hv}$ ,  
326 and the least sensitive parameters are  $\phi_h$  followed by  $\mu_v$ .

#### 327 4.3.2 Uncertainty and Sensitivity Analysis on the three Endemic Prevalences

328 The estimated distributions of prevalence ( $\mathcal{P}_{A_h}$ ,  $\mathcal{P}_{I_h}$ , and  $\mathcal{P}_{I_v}$ ) are shown in Figure 7b–7d. The mean  
329 estimate of  $\mathcal{P}_{A_h}$  was found to be 0.0045 with a standard deviation of 0.0019. The parameter  $\phi_h$  was  
330 found to be the most influential parameter on the prevalence of asymptomatic,  $\mathcal{P}_{A_h}$ . The remaining  
331 parameters in descending order of magnitude of PRCC were,  $\theta_h$ ,  $\ell$ ,  $\beta_{vh}$ , and  $\beta_{hv}$ , with  $\mu_v$  and  $\mu_h$  being  
332 least sensitive parameters to  $\mathcal{P}_{A_h}$ . The sensitivity analysis performed on  $\mathcal{P}_{I_h}$  reveal that the treatment  
333 rate,  $\theta_h$  is the most influential parameter for changing disease prevalence. The mean estimates of vector  
334 prevalence were found to be 0.0526 with a with a standard deviation of 0.0432. From our sensitivity  
335 analysis of  $\mathcal{P}_{I_v}$  we observe in Table 7 and Figure 7h, that there are four most influential parameters.  
336 These parameters in decreasing order of ranks, are  $\theta_h$ ,  $\beta_{vh}$ ,  $b$  and  $\mu_v$ .

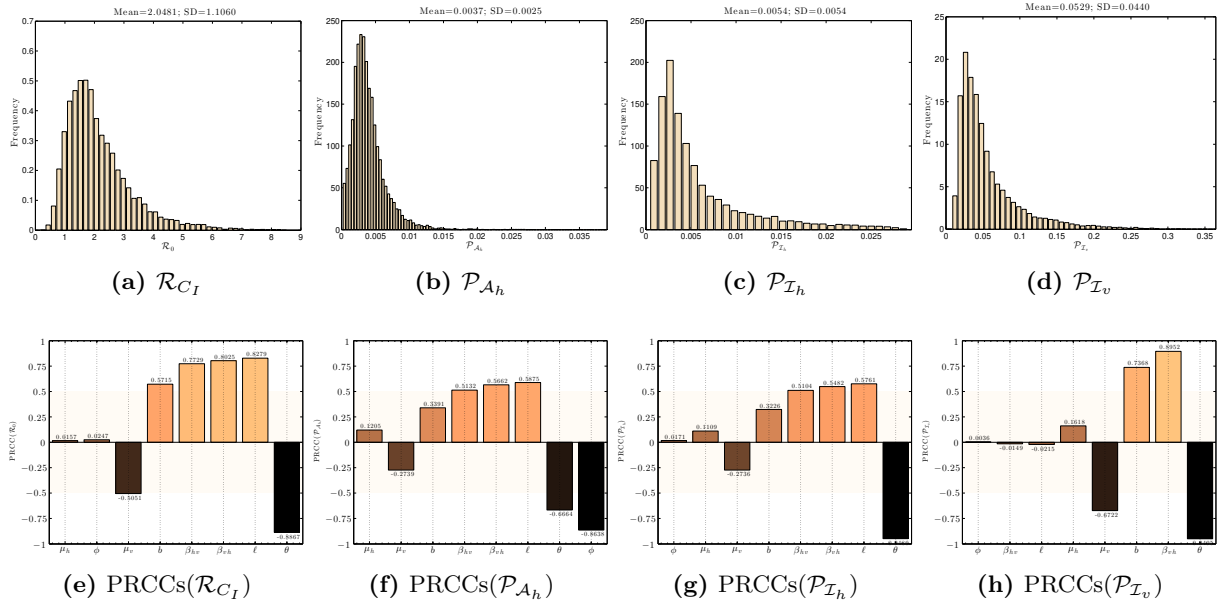

**Figure 7.** Results for India: Uncertainty in the Reproduction Number (Subfigure 7a) and the Prevalence (Subfigures 7b –7d) of Asymptomatics, Infectious Humans and Infectious Sandflies, respectively. Tornado plot showing partial rank correlation coefficients (PRCCs) of the Reproduction number (7e) and the Prevalence (7f –7h) in Asymptomatics, Infectious Humans and Infectious Sandflies, respectively.

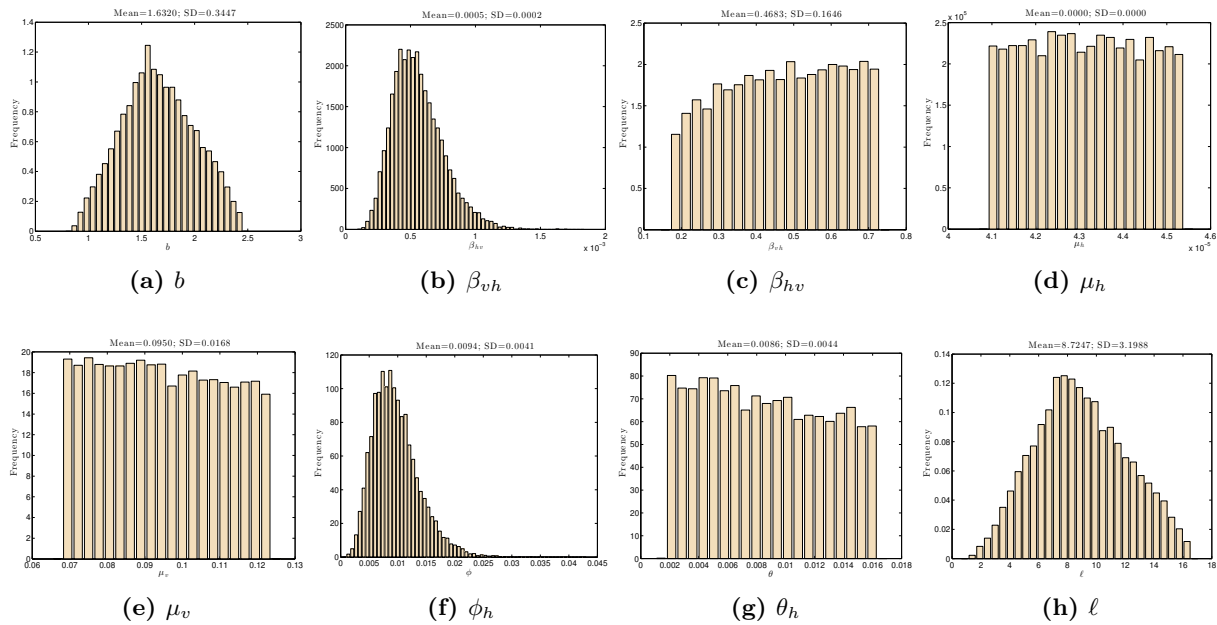

**Figure 6.** Parameter distributions conditional on  $\mathcal{R}_C > 1$  for India obtained from uncertainty analysis of the prevalence



## 337 4.4 Assessment for Sudan

### 338 4.4.1 Uncertainty and Sensitivity Analysis on $\mathcal{R}_{C_S}$

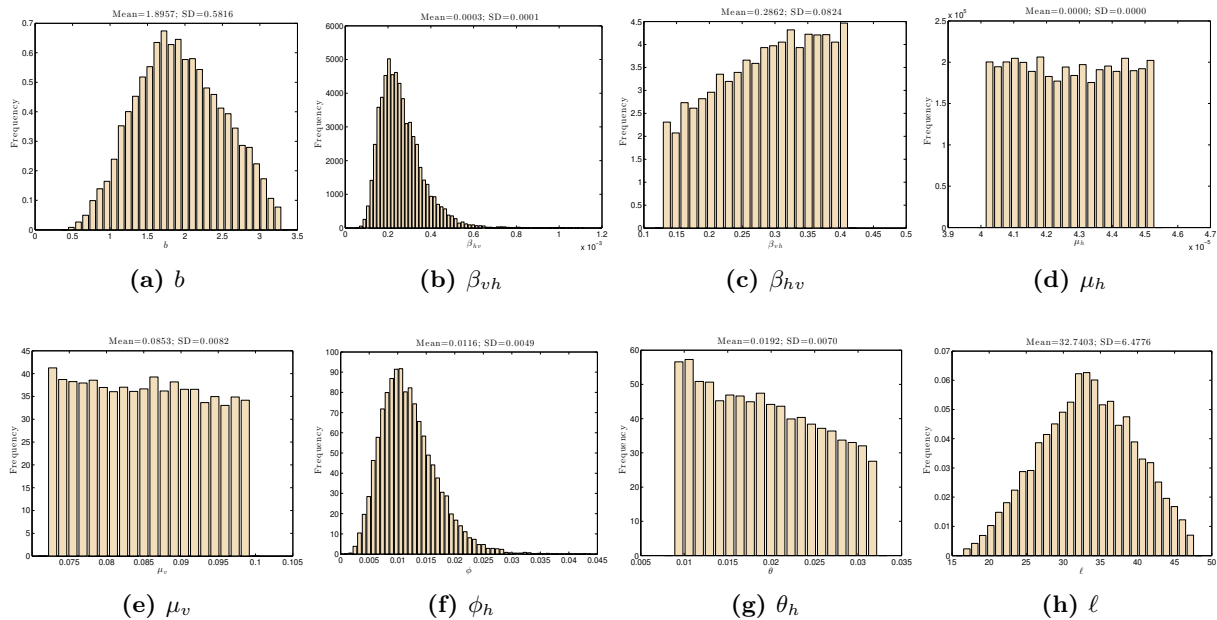

**Figure 8.** Estimated distributions of the model parameters conditional on  $\mathcal{R}_{C_S} > 1$  for Sudan obtained from uncertainty analysis of the prevalence

339 The result of uncertainty analysis on  $\mathcal{R}_{C_S}$  is shown in Figure 9a, where the mean estimate of  $\mathcal{R}_{C_S}$  is 1.43,  
 340 and the standard deviation is 0.6. From the Table 8 and Figure 9a we observe  $\beta_{hv}$ ,  $b$ ,  $\theta_h$ ,  $\beta_{vh}$ ,  $\ell$ , and  $\mu_v$   
 341 are most sensitive (in order of ranking) to  $\mathcal{R}_{C_S}$ . The first negatively correlated parameter was  $\theta_h$  which  
 342 indicated that treatment is effective for controlling infection, followed by  $\mu_v$  which may relate to the  
 343 impact of vector related control programs. The top two most positive parameters (i.e., positive PRCC)  
 344 were  $\beta_{hv}$  and  $b$ , which indicates that sandflies parameters may play a significant role in the estimation of  
 345  $\mathcal{R}_{C_S}$ .

### 346 4.4.2 Uncertainty and Sensitivity Analysis on the Endemic Infected Prevalence

347 For the asymptomatic prevalence,  $\mathcal{P}_{A_h}$ , we estimated a mean prevalence of 0.0024 with a standard  
 348 deviation of 0.0018. Results of uncertainty analysis is shown for Sudan in Figure 9b. From Table 8 and  
 349 Figure 9f, we observe that the prevalence of asymptomatic population is negatively correlated but most  
 350 sensitive to  $\phi_h$ , followed by the parameters  $\beta_{hv}$ ,  $\theta_h$ ,  $b$ ,  $\beta_{vh}$ , and  $\ell$ . The natural death rates,  $\mu_v$ , and  
 351  $\mu_h$ , in humans and sand flies, respectively were the least sensitive input parameters to the prevalence  
 352 of asymptomatic humans. From our uncertainty analysis on  $\mathcal{P}_{I_h}$  (Figure 9c), we found the average  
 353 prevalence estimate to be 0.0014 with a standard deviation of 0.0010. The results of our sensitivity  
 354 analysis, summarize in Table 8 and displayed in Figure 9g shows that the treatment rate of infectious  
 355 humans,  $\theta_h$ , is the most influential parameter in determining prevalence level of clinical infection in  
 356 humans. The infection related parameters,  $\beta_{hv}$ ,  $b$ ,  $\beta_{vh}$  and  $\ell$ , also plays a dominant role in disease  
 357 persistence, but less than  $\theta_h$ . Finally, the result of uncertainty analysis on the prevalence of infection  
 358 in sand flies,  $\mathcal{P}_{I_v}$ , shown in Figure 9d. The estimated sample mean of  $\mathcal{P}_{I_v}$  is 0.0155 with a standard

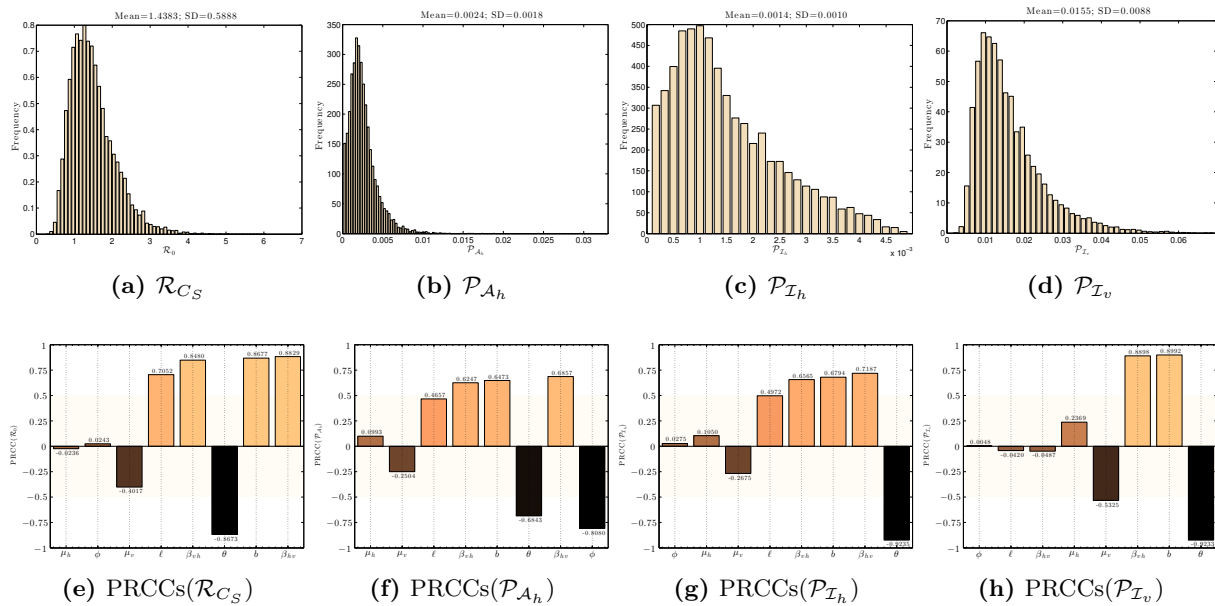

**Figure 9.** Results for Sudan: Uncertainty of the Reproduction Number (Subfigure 9a) and the Prevalence (Subfigures 9b –9d) of Asymptomatics, Infectious Humans and Infectious Sandflies, respectively. Tornado plot showing partial rank correlation coefficients (PRCCs) of the Reproduction Number (Subfigure 9e) and the Prevalence (Subfigures 9f –9h) of Asymptomatics, Infectious Humans and Infectious Sandflies, respectively.

359 deviation of 0.0088. Our analysis identified the parameters sensitivity to changes in  $\mathcal{P}_{I_v}$  (Table 8 and  
 360 Figure 9h). The result shows that the treatment rate,  $\theta_h$  is the most dominant parameter followed by  $b$ ,  
 361  $\beta_{vh}$ , and  $\mu_v$ . The less influential parameters on  $\mathcal{P}_{I_v}$  are  $\mu_h$ ,  $\ell$ ,  $\phi_h$ , and  $\beta_{vh}$ .

#### 362 4.5 Comparative Assessment of VL in India and Sudan

363 Parameter estimates were obtained either from the literature or estimated from field data, and were used  
 364 for an evaluation of country-specific risks. The risk was quantified to study differences and similarities in  
 365 VL disease burden in India and Sudan. In this section, we conduct comparative (between two countries)  
 366 assessment by studying impact of change in parameter estimations on VL disease burden in these two  
 367 countries when risk is measured either in terms of  $\mathcal{R}_C$  or prevalence of infection. The assessment was  
 368 based on uncertainty and sensitivity analyses..

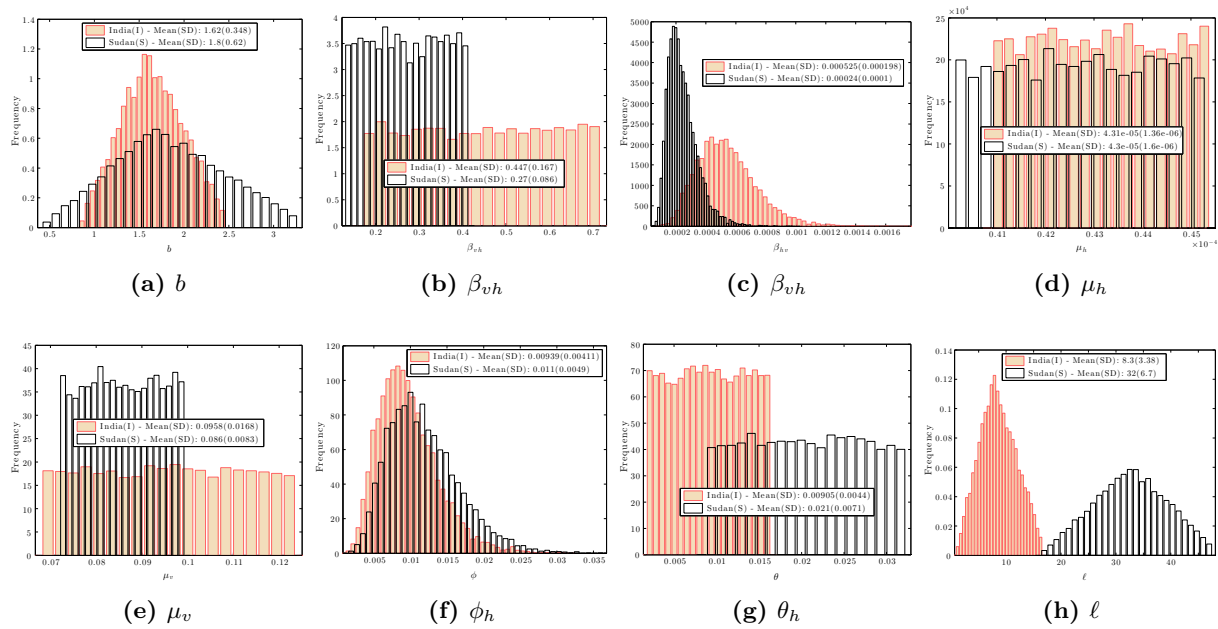

**Figure 10.** A comparison of initially assigned distributions in Table 6 for model parameters (a)  $b$ , (b)  $\beta_{vh}$ , (c)  $\beta_{hv}$ , (d)  $\mu_h$ , (e)  $\mu_v$ , (f)  $\phi_h$ , (g)  $\theta_h$  and (h)  $\ell$  used in the sensitivity and uncertainty analyses for the Indian and Sudan populations

#### 369 4.5.1 Comparison when risk is defined based on reproduction number

370 The observed difference in the mean estimate of  $\mathcal{R}_{C_I}$  ( $\approx 2.0$ ) and  $\mathcal{R}_{C_S}$  ( $\approx 1.4$ ) could be because India  
 371 has much higher levels of endemicity (almost more than 40%) as compared to Sudan. Statistical test was  
 372 carried out to identify if there exist any significant differences in the estimated means of  $\mathcal{R}_C$  for India and  
 373 Sudan (t-test with  $H_0 : \mu(\mathcal{R}_{C_S}) = \mu(\mathcal{R}_{C_I})$  against  $H_1 : \mu(\mathcal{R}_{C_S}) \neq \mu(\mathcal{R}_{C_I})$  where the  $\mu$  represents mean  
 374 of  $\mathcal{R}_{C_I}$  and  $\mathcal{R}_{C_S}$ ). The analysis suggested rejection of null hypothesis (Table 9), that is, the obtained  
 375 point estimates of  $\mathcal{R}_C$  between India and Sudan are different. We also performed Kolmogorov-Smirnov  
 376 test between empirical distributions of  $\mathcal{R}_C$  for the two countries and found that empirical distributions  
 377 are not the same.

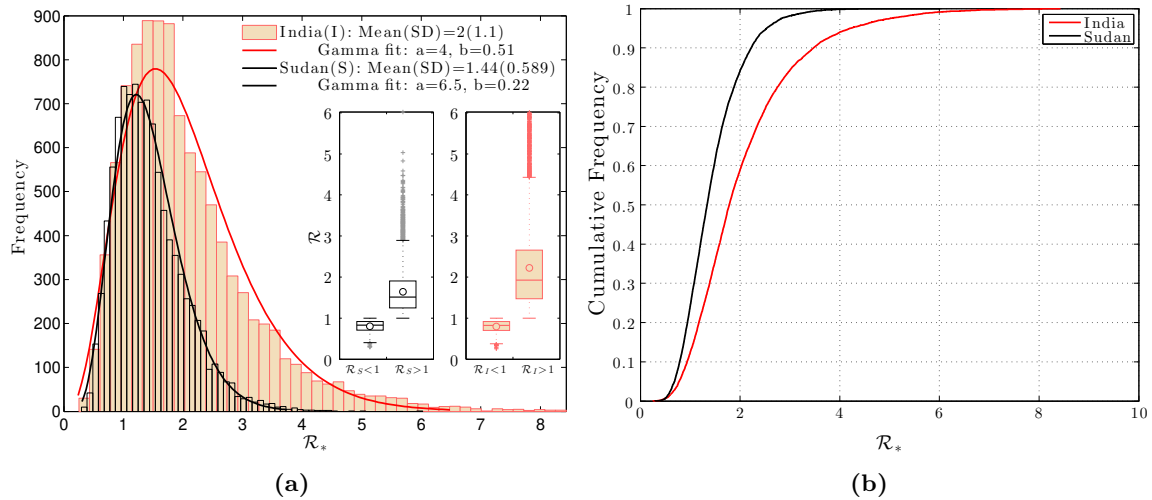

**Figure 11.** (a) The comparison between estimated distributions of  $\mathcal{R}_C$  for India and Sudan. The box plot compares the mean( $\circ$ ), median, minimum, and maximum of  $\mathcal{R}_C$  estimates for both countries. It is found that the gamma, is a best-fitted distribution for the samples from the uncertainty analysis. Table 2 summarizes the parameter fitting for the gamma distribution for both countries. (b) The empirical cumulative distributions of the  $\mathcal{R}_C$ s for India and Sudan

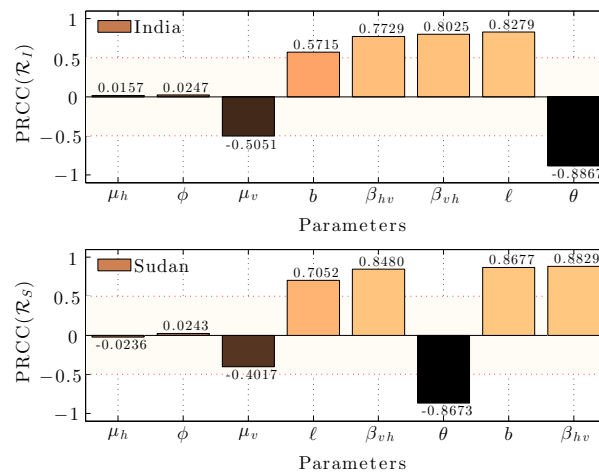

**Figure 12.** Tornado diagrams of partial rank correlation coefficients, indicating the importance of all eight input parameters that influence the threshold quantity  $\mathcal{R}_C$ . Figure shows a comparison of sensitivity indices for India and Sudan. In both regions, the parameters that have  $PRCC > 0$  indicates an increasing influence on  $\mathcal{R}_C$  values and those having  $PRCC < 0$  will decrease  $\mathcal{R}_C$  values.

378 The outcome of the sensitivity analysis (shown in Table 10 and Figures 12; in order of magnitude)  
 379 highlights difference in influence of parameters for India and Sudan. In Figures 12 we observe the sign  
 380 and the magnitude of the PRCC values for each parameter. We observe that all parameter, (namely,  $b$ ,  $\ell$ ,  
 381  $\beta_{hv}$ ,  $\beta_{vh}$ , and  $\theta_h$ ) are the most important parameters of  $\mathcal{R}_C$  for both countries. The parameters  $b$ ,  $\ell$ ,  $\beta_{vh}$ ,  
 382 and  $\beta_{hv}$  with positive PRCC values indicate positive impact on  $\mathcal{R}_C$  for both countries. The parameter

383  $\theta_h$  plays a negative role on the estimation of  $\mathcal{R}_C$ , that is, one unit increase in  $\theta_h$  will result in one unit  
 384 decrease in  $\mathcal{R}_C$  estimate.

385 **4.5.2 Comparative assessment if risk is based on different prevalences**

386 **Point Prevalence of Asymptomatic ( $\mathcal{P}_{A_h}$ ):** Although the level of  $\mathcal{P}_{A_h}$ , can be determined by how  
 387 much  $\mathcal{R}_C$  is greater than unity, it is useful to understand the risk posed by an asymptomatic individuals  
 388 during intensive control. We show that there is a significant difference between the point prevalence  
 389 of asymptomatic for India (Mean(SD)=0.0037 (0.003)) and Sudan (Mean(SD)=0.0024 (0.002)). There  
 390 is also a significant statistical difference between the  $\mathcal{P}_{A_h}$ -distribution of the two countries (two-sample  
 391 Kolmogorov–Smirnov test,  $p < 0.050$ ). Combining the results in section 4.3.2 and 4.4.2 we compare the  
 392 results of sensitivity analysis on  $\mathcal{P}_{A_h}$  for both countries. We observe from Figure 13c that the most  
 393 sensitive parameter to both countries in descending order are  $\phi_h, \theta_h, \ell, \beta_{vh}, \beta_{hv}$ , and  $b$  and the least  
 394 sensitive parameter in common to both regions are  $\mu_v$  and  $\mu_h$ . From Table 11 and Figure 13c we observed  
 395 that the two countries differ in order of the parameter ranking with the most sensitive parameter being,  
 396  $\phi_h$ . In descending order they are as follows: for India, we have  $\theta_h, \ell, \beta_{vh}, \beta_{hv}$ , and  $b$  and for Sudan, we  
 397 have  $\beta_{vh}, \theta_h, b, \beta_{hv}$ , and  $\ell$ .

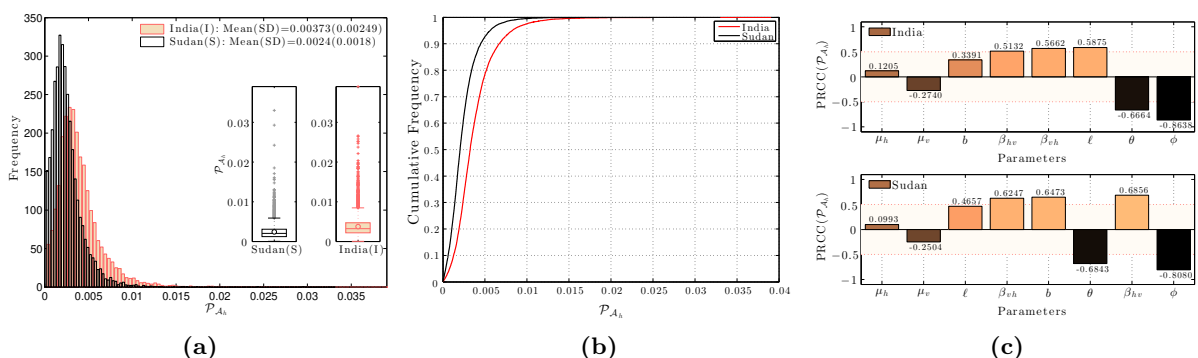

**Figure 13.** Comparison of uncertainty and sensitivity analysis results on the equilibrium prevalence of asymptomatic humans ( $\mathcal{P}_{A_h}$ ): (a) Frequency distributions for contributions, (b) empirical cumulative distributions, and (c) tornado diagrams of partial rank correlation coefficients

| India        |                             |      | Sudan        |                             |
|--------------|-----------------------------|------|--------------|-----------------------------|
| Parameter    | PRCC( $\mathcal{P}_{A_h}$ ) | Rank | Parameter    | PRCC( $\mathcal{P}_{A_h}$ ) |
| $\phi_h$     | -0.8638                     | 1    | $\phi_h$     | -0.8080                     |
| $\theta_h$   | -0.6664                     | 2    | $\beta_{hv}$ | 0.6856                      |
| $\ell$       | 0.5875                      | 3    | $\theta_h$   | -0.6843                     |
| $\beta_{vh}$ | 0.5662                      | 4    | $b$          | 0.6473                      |
| $\beta_{hv}$ | 0.5132                      | 5    | $\beta_{vh}$ | 0.6247                      |
| $b$          | 0.3391                      | 6    | $\ell$       | 0.4657                      |
| $\mu_v$      | -0.2740*                    | 7    | $\mu_v$      | -0.2504*                    |
| $\mu_h$      | 0.1205*                     | 8    | $\mu_h$      | 0.0993*                     |

**Table 11.** A comparison of the partial rank correlation coefficients for input parameters of the output value ( $\mathcal{P}_{A_h}$ ). Where (\*) denotes  $p < 0.01$ . for India and Sudan.

398 **Point Prevalence of Infectious humans ( $\mathcal{P}_{I_h}$ ):** The results showed that there is a significant

399 differences between the point prevalence of Infected humans for India (Mean(SD)=0.0053 (0.005)) and  
 400 Sudan (Mean(SD)=0.0014 (0.001)). Using  $p$ -value  $< 0.05$ , the two-sample Kolmogorov–Smirnov test,  
 401 suggests statistically significant difference between the distributions corresponding to two countries (see  
 402 Figure 14a - 14b). Sensitivity analysis shows that  $\mathcal{P}_{I_h}$  is most sensitive to  $\theta_h$ ,  $\ell$ ,  $b$ ,  $\beta_{vh}$ , and  $\beta_{hv}$  and  
 403 least sensitive to  $\mu_h$ ,  $\mu_v$  and  $\phi_h$  for both countries (Table 12 and Figure 14c). The treatment rate, the  
 404 first most sensitive parameter, and  $\mu_v$ ,  $\mu_h$  and  $\phi_h$  in same decreasing order of influence, are common  
 405 parameters for both countries. For India, parameters ranking in descending order is  $\ell$ ,  $\beta_{vh}$ ,  $\beta_{hv}$  and  $b$   
 406 whereas for Sudan the order of parameters is  $\beta_{vh}$ ,  $b$ ,  $\beta_{hv}$ , and  $\ell$ .

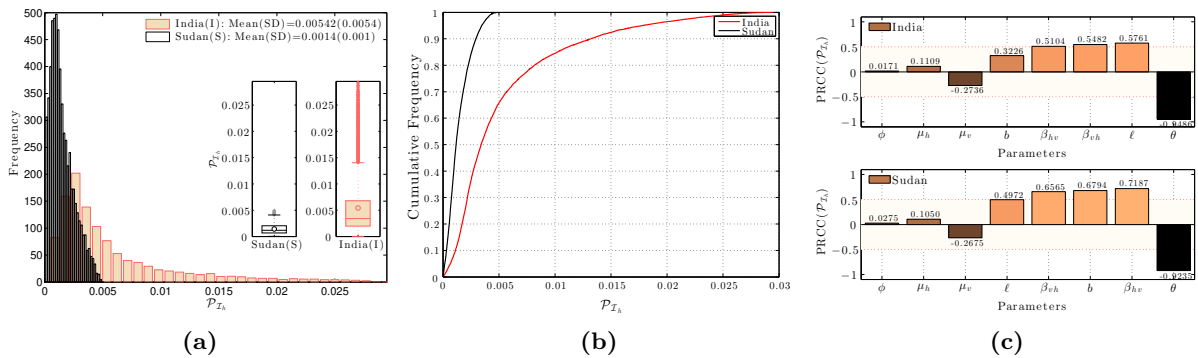

**Figure 14.** Comparison of result from uncertainty and sensitivity analysis results on the equilibrium prevalence of infected humans ( $\mathcal{P}_{I_h}$ ): (a) Frequency distributions for contributions, (b) empirical cumulative distributions, and (c) tornado diagrams of partial rank correlation coefficients.

| India        |                             |      | Sudan        |                             |  |
|--------------|-----------------------------|------|--------------|-----------------------------|--|
| Parameter    | PRCC( $\mathcal{P}_{I_h}$ ) | Rank | Parameter    | PRCC( $\mathcal{P}_{I_h}$ ) |  |
| $\theta_h$   | -0.9486                     | 1    | $\theta_h$   | -0.9235                     |  |
| $\ell$       | 0.5761                      | 2    | $\beta_{hv}$ | 0.7187                      |  |
| $\beta_{vh}$ | 0.5482                      | 3    | $b$          | 0.6794                      |  |
| $\beta_{hv}$ | 0.5104                      | 4    | $\beta_{vh}$ | 0.6565                      |  |
| $b$          | 0.3226                      | 5    | $\ell$       | 0.4972                      |  |
| $\mu_v$      | -0.2736*                    | 6    | $\mu_v$      | -0.2675*                    |  |
| $\mu_h$      | 0.1109*                     | 7    | $\mu_h$      | 0.1050*                     |  |
| $\phi_h$     | 0.0171*                     | 8    | $\phi_h$     | 0.0275*                     |  |

**Table 12.** A comparison of the partial rank correlation coefficients for input parameters of the output value ( $\mathcal{P}_{I_h}$ ). Where (\*) denotes  $p < 0.01$ . for India and Sudan.

407 **Point Prevalence of of Infected sandflies ( $\mathcal{P}_{I_v}$ ):** We showed that there is also a significant differ-  
 408 ence between the point prevalence in infected sand flies for India (Mean(SD)=0.0519 (0.042)) and Sudan  
 409 (Mean(SD)=0.016 (0.009)), however, there is no statistical difference between the two distributions (Fig-  
 410 ure 15a - 15b using two-sample Kolmogorov–Smirnov test,  $p < 0.05$ ). Parameters  $b$ ,  $\theta_h$ ,  $\mu_v$ , and  $\beta_{vh}$   
 411 were most sensitive to the prevalence of infection in sand flies,  $\mathcal{P}_{I_v}$ , for both countries (see Table 13 and  
 412 Figure 15c). Between the two parameters,  $\beta_{hv}$  ( $b$ ) is relatively more sensitive for India (Sudan). The  
 413 least important parameter were  $\mu_h$ ,  $\ell$ ,  $\phi_h$ , and  $\beta_{hv}$  with the exception that the ranks of  $\ell$  and  $\beta_{hv}$  are  
 414 different.



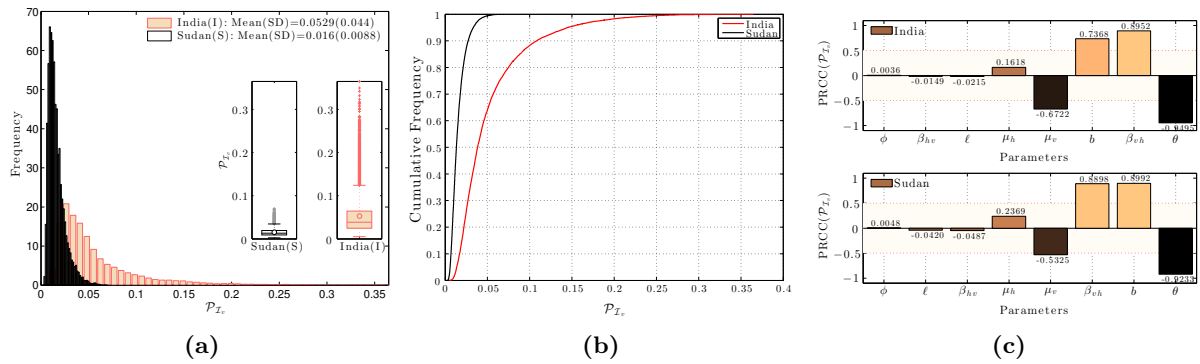

**Figure 15.** Comparison of uncertainty and sensitivity analysis results on the equilibrium prevalence of infected sandflies ( $\mathcal{P}_{L_v}$ ): (a) Frequency distributions for contributions, (b) empirical cumulative distributions, and (c) tornado diagrams of partial rank correlation coefficients.

| India        |                             |      | Sudan        |                             |  |
|--------------|-----------------------------|------|--------------|-----------------------------|--|
| Parameter    | PRCC( $\mathcal{P}_{L_v}$ ) | Rank | Parameter    | PRCC( $\mathcal{P}_{L_v}$ ) |  |
| $\theta_h$   | -0.9495                     | 1    | $\theta_h$   | -0.9233                     |  |
| $\beta_{vh}$ | 0.8952                      | 2    | $b$          | 0.8992                      |  |
| $b$          | 0.7368                      | 3    | $\beta_{vh}$ | 0.8898                      |  |
| $\mu_v$      | -0.6722                     | 4    | $\mu_v$      | -0.5325                     |  |
| $\mu_h$      | 0.1618*                     | 5    | $\mu_h$      | 0.2369*                     |  |
| $\ell$       | -0.0215*                    | 6    | $\beta_{hv}$ | -0.0487*                    |  |
| $\beta_{hv}$ | -0.0149*                    | 7    | $\ell$       | -0.0420*                    |  |
| $\phi_h$     | 0.0036*                     | 8    | $\phi_h$     | 0.0048*                     |  |

**Table 13.** A comparison of the partial rank correlation coefficients for input parameters of the output value ( $\mathcal{P}_{L_v}$ ). Where (\*) denotes  $p < 0.01$ . for India and Sudan.

**Table 2.** Model parameter estimates related to human and vector (*Phlebotomus* sand fly species) populations in India and Sudan

| Parameter                  | Definition                                                                             | Units         | Mean (ranges)                 |                      | References           |                           | References              |                         |
|----------------------------|----------------------------------------------------------------------------------------|---------------|-------------------------------|----------------------|----------------------|---------------------------|-------------------------|-------------------------|
|                            |                                                                                        |               | Human Population              |                      | India's Estimates    |                           | Sudan's Estimates       |                         |
| $\beta_{vh}$               | Transmission probability of the parasite from infected sandflies to susceptible humans | Dimensionless | 0.0694<br>(0.0266–0.1652)     | Estimated            | Estimated            | 0.0012<br>(0.0007–0.002)  | Estimated               | Estimated               |
| $\phi_h$                   | Per capita development rate of clinical symptoms of VL infection                       | $day^{-1}$    | 0.00975<br>(0.006–0.0167)     | [17, 60, 63, 79, 83] | [17, 60, 63, 79, 83] | 0.0098<br>(0.0042–0.0167) | [14, 17, 34, 37]        | [14, 17, 34, 37]        |
| $\mu_h$                    | Human daily per capita natural mortality rate                                          | $day^{-1}$    | 4.302e-5<br>(4.08e-5–4.55e-5) | Estimated<br>(see C) | Estimated<br>(see C) | 4.3e-5<br>(4e-5–4.54e-5)  | Estimated<br>(see C)    | Estimated<br>(see C)    |
| $\mathcal{P}_{I_h}$        | Point prevalence in humans                                                             | number        | (0.002378–0.002692)           | [76]                 | [76]                 | (0.0006–0.0013)           | Estimated<br>(see C)    | Estimated<br>(see C)    |
| $\theta_h$                 | Per capita treatment rate for VL                                                       | $day^{-1}$    | 0.0351(0.0067–0.0597)         | [1, 7, 8]            | [1, 7, 8]            | 0.0143<br>(0.0027–0.0408) | [3, 18, 46, 56, 59, 73] | [3, 18, 46, 56, 59, 73] |
| <b>Sand fly Population</b> |                                                                                        |               |                               |                      |                      |                           |                         |                         |
| <b>P. Argentipes</b>       |                                                                                        |               |                               |                      |                      |                           |                         |                         |
| $\beta_{hv}$               | Transmission probability of the parasite from an infected human to susceptible sandfly | Dimensionless | 0.025 (0.013–0.063)           | [77, 78]             | [77, 78]             | 0.1275<br>(0.0640–0.1706) | Estimated               | Estimated               |
| $b$                        | Biting rate of sand flies                                                              | $day^{-1}$    | 0.7997<br>(0.1667–2.083)      | [22, 51]             | [22, 51]             | 1.6208<br>(0.35–3.3583)   | [27]                    | [27]                    |
| $\ell$                     | Sandfly Landing rate                                                                   | $day^{-1}$    | 6.21 (3.47–9.9)               | [45]                 | [45]                 | 32 (15.7–48.3)            | [27]                    | [27]                    |
| $\mu_v$                    | Adult sand fly daily per capita mortality rate                                         | $day^{-1}$    | 0.0833 (0.0667–0.1)           | [44, 50, 65, 75, 77] | [44, 50, 65, 75, 77] | 0.0857 (0.1–0.0714)       | [32, 38]                | [32, 38]                |
| $\mathcal{P}_{I_v}$        | Point prevalence in sandflies                                                          | number        | (0.0085–0.0284)               | [82]                 | [82]                 | (0.019–0.05)              | [32]                    | [32]                    |
| <b>P. orientalis</b>       |                                                                                        |               |                               |                      |                      |                           |                         |                         |

|                                   | India   |         |         | Sudan   |         |         |
|-----------------------------------|---------|---------|---------|---------|---------|---------|
| Parameters                        | Min     | Mean    | Max     | Min     | Mean    | Max     |
| <b>Fixed</b>                      |         |         |         |         |         |         |
| $b$                               | -       | 2.08    | -       | -       | 1.6208  | -       |
| $\mu_h$                           | -       | 4.54e-5 | -       | -       | 4.3e-5  | -       |
| $\mu_v$                           | -       | 0.0833  | -       | -       | 0.0857  | -       |
| $\phi_h$                          | -       | 0.00975 | -       | -       | 0.0098  | -       |
| $\theta_h$                        | -       | 0.0083  | -       | -       | 0.0143  | -       |
| <b>Varied</b>                     |         |         |         |         |         |         |
| $\mathcal{P}_h$                   | 0.0024  | -       | 0.0027  | 0.0013  | -       | 0.0015  |
| $\mathcal{P}_v$                   | 0.0054  | -       | 0.0157  | 0.054   | -       | 0.037   |
| $\ell$                            | 8.68    | 12.15   | 17      | 15.7    | 32      | 48.3    |
| $\beta_{hv}$                      | 0.025   | 0.012   | 0.038   | 0.0032  | 0.0167  | 0.041   |
| $\mathcal{R}_C$                   | 1.3     | 2.0     | 2.1     | 1.1     | 1.3     | 1.5     |
| <b>Estimates using Approach 1</b> |         |         |         |         |         |         |
| $\beta_{vh}$                      | 0.21    | 0.44    | 0.7     | 0.24    | 0.53    | 0.95    |
| $\beta_{hv}$                      | 0.00015 | 0.00035 | 0.00091 | 0.00013 | 0.00042 | 0.0012  |
| <b>Estimates using Approach 2</b> |         |         |         |         |         |         |
| $\beta_{vh}$                      | 0.19    | 0.4     | 0.64    | 0.2     | 0.41    | 0.68    |
| $\beta_{hv}$                      | 4.9e-05 | 0.00013 | 0.0004  | 3.6e-05 | 0.00011 | 0.00037 |

**Table 3.** Summary of estimates of the transmission probabilities,  $\beta_{hv}$  and  $\beta_{vh}$ , using the two approaches with mean and ranges for other parameters (Table 2) for India and Sudan were fixed.

| Country | $R_C$ estimated values  |                                                                                        |
|---------|-------------------------|----------------------------------------------------------------------------------------|
| India   | $M_I$ : Mean(SD)        | 2.11 (1.6)                                                                             |
| Sudan   | $M_S$ : Mean(SD)        | 1.31 (0.79)                                                                            |
|         | 95% CI of $ M_I - M_S $ | (0.77, 0.84)                                                                           |
|         | T-test                  | $H_0 :  M_I - M_S  = 0$<br>$P - value < 0.05$                                          |
|         | Test statistic          | tstat(Value of the test statistic): 146.0191<br>Degrees of freedom of the test : 19998 |

**Table 4.** Mean  $R_C$  estimates and results of statistical test for testing differences of  $R_C$  between India and Sudan

| Similarity & Differences                                                                                                                                         |                                                                                                                                                           |
|------------------------------------------------------------------------------------------------------------------------------------------------------------------|-----------------------------------------------------------------------------------------------------------------------------------------------------------|
| Critical risk factors for the VL dynamics in both countries are: (i) Sandfly biting rates and (ii) Transmission rates between vector and human host              | Treatment rate is critical for controlling outbreaks in India but less important in case of controlling outbreaks in Sudan.                               |
| <i>Infection transmission related (mean estimates for India are higher than that of Sudan)</i>                                                                   |                                                                                                                                                           |
| <b>India</b> [mean (std)]<br>$\beta_{vh} = 0.45$ (0.17)<br>$\beta_{hv} = 0.0005$ (0.0002)<br>$\mathcal{R}_C = 2.1$ (1.1)<br>$P(\mathcal{R}_C > 1) = 0.73$        | <b>Sudan</b> [mean (std)]<br>$\beta_{vh} = 0.27$ (0.09)<br>$\beta_{hv} = 0.0002$ (0.0001)<br>$\mathcal{R}_C = 1.3$ (0.6)<br>$P(\mathcal{R}_C > 1) = 0.58$ |
| <i>Sandfly ecology related (mean estimates for Sudan are higher than that of India)</i>                                                                          |                                                                                                                                                           |
| <b>India</b> [P. Argentipes]<br>$b = 1.6$ per day (Avg. biting rate)<br>$\ell = 8.3$ per day (Avg. landing rate)<br>$1/\mu_v = 10.0$ days (Avg. adult life span) | <b>Sudan</b> [P. Orientalis]<br>$b = 1.8$ per day<br>$\ell = 32.0$ per day<br>$1/\mu_v = 11.1$ days                                                       |

**Table 5.** Comparing and contrasting risk factors that are critical to VL dynamics between India and Sudan.

| Parameter    | India                         | Sudan                         |
|--------------|-------------------------------|-------------------------------|
| $b$          | $\mathcal{T}(0.8, 1.6, 2.5)$  | $\mathcal{T}(0.35, 1.8, 3.4)$ |
| $\ell$       | $\mathcal{T}(0.55, 8.3, 17)$  | $\mathcal{T}(16, 32, 48)$     |
| $\phi_h$     | $\mathcal{G}(5.5470, 0.0021)$ | $\mathcal{G}(5.2727, 0.0018)$ |
| $\beta_{vh}$ | $\mathcal{G}(7, 7.5e-05)$     | $\mathcal{G}(6.3, 3.7e-05)$   |
| $\beta_{hv}$ | $\mathcal{U}(0.16, 0.73)$     | $\mathcal{U}(0.12, 0.42)$     |
| $\theta_h$   | $\mathcal{U}(0.0014, 0.0167)$ | $\mathcal{U}(0.0082, 0.0329)$ |
| $\mu_h$      | $\mathcal{U}(4.1e-5, 4.5e-5)$ | $\mathcal{U}(4e-5, 4.5e-5)$   |
| $\mu_v$      | $\mathcal{U}(0.0667, 0.1250)$ | $\mathcal{U}(0.071, 0.1)$     |

**Table 6.** Estimated parametric distribution of the model parameters for India and Sudan. The notations are  $\rightarrow$  Triangular:  $\mathcal{T}(min, mode, max)$ ; Gamma:  $\mathcal{G}(shape, scale)$ ; Uniform:  $\mathcal{U}(min, max)$ .

| Output Rank | $\mathcal{R}_{C_i}$ |        | $\mathcal{P}_{A_h}$ |        | $\mathcal{P}_{I_h}$ |        | $\mathcal{P}_{I_v}$ |         |
|-------------|---------------------|--------|---------------------|--------|---------------------|--------|---------------------|---------|
|             | Parameter           | PRCC   | Parameter           | PRCC   | Parameter           | PRCC   | Parameter           | PRCC    |
| 1           | $\theta_h$          | -0.89  | $\phi_h$            | -0.86  | $\theta_h$          | -0.95  | $\theta_h$          | -0.95   |
| 2           | $\ell$              | 0.83   | $\theta_h$          | -0.67  | $\ell$              | 0.58   | $\beta_{vh}$        | 0.9     |
| 3           | $\beta_{vh}$        | 0.8    | $\ell$              | 0.59   | $\beta_{vh}$        | 0.55   | $b$                 | 0.74    |
| 4           | $\beta_{hv}$        | 0.77   | $\beta_{vh}$        | 0.57   | $\beta_{hv}$        | 0.51   | $\mu_v$             | -0.67   |
| 5           | $b$                 | 0.57   | $\beta_{hv}$        | 0.51   | $b$                 | 0.32   | $\mu_h$             | 0.16*   |
| 6           | $\mu_v$             | -0.51  | $b$                 | 0.34   | $\mu_v$             | -0.27* | $\ell$              | -0.021* |
| 7           | $\phi_h$            | 0.025* | $\mu_v$             | -0.27* | $\mu_h$             | 0.11*  | $\beta_{hv}$        | -0.015* |
| 8           | $\mu_h$             | 0.016* | $\mu_h$             | 0.12*  | $\phi_h$            | 0.017* | $\phi_h$            | 0.0036* |

**Table 7.** Shows the PRCCs by rank of importance for the input parameters of the output value  $\mathcal{R}_C$ ,  $\mathcal{P}_{A_h}$ ,  $\mathcal{P}_{I_h}$ , and  $\mathcal{P}_{I_v}$  for India. (\*) denotes PRCCs that are non-significant.

| Output Rank | $\mathcal{R}_{C_S}$ |         | $\mathcal{P}_{A_h}$ |         | $\mathcal{P}_{I_h}$ |         | $\mathcal{P}_{I_v}$ |         |
|-------------|---------------------|---------|---------------------|---------|---------------------|---------|---------------------|---------|
|             | Parameter           | PRCC    | Parameter           | PRCC    | Parameter           | PRCC    | Parameter           | PRCC    |
| 1           | $\beta_{hv}$        | 0.88    | $\phi_h$            | -0.81   | $\theta_h$          | -0.92   | $\theta_h$          | -0.92   |
| 2           | $b$                 | 0.87    | $\beta_{hv}$        | 0.69    | $\beta_{hv}$        | 0.72    | $b$                 | 0.9     |
| 3           | $\theta_h$          | -0.87   | $\theta_h$          | -0.68   | $b$                 | 0.68    | $\beta_{vh}$        | 0.89    |
| 4           | $\beta_{vh}$        | 0.85    | $b$                 | 0.65    | $\beta_{vh}$        | 0.66    | $\mu_v$             | -0.53   |
| 5           | $\ell$              | 0.71    | $\beta_{vh}$        | 0.62    | $\ell$              | 0.5     | $\mu_h$             | 0.24    |
| 6           | $\mu_v$             | -0.4    | $\ell$              | 0.47    | $\mu_v$             | -0.27 * | $\beta_{hv}$        | -0.049* |
| 7           | $\phi_h$            | 0.024*  | $\mu_v$             | -0.25 * | $\mu_h$             | 0.1*    | $\ell$              | -0.042* |
| 8           | $\mu_h$             | -0.024* | $\mu_h$             | 0.099*  | $\phi_h$            | 0.028*  | $\phi_h$            | 0.0048* |

**Table 8.** The PRCCs by rank of importance for the input parameters of the output values of  $\mathcal{R}_{C_S}$ ,  $\mathcal{P}_{A_h}$ ,  $\mathcal{P}_{I_h}$ , and  $\mathcal{P}_{I_v}$  for Sudan. (\*) denotes  $p < 0.01$ .

| Output              | India(I) |         | Sudan(S) |        | Comparison between India(I) and Sudan(S) |                  |              |
|---------------------|----------|---------|----------|--------|------------------------------------------|------------------|--------------|
|                     | Mean     | SD      | Mean     | SD     | 2-Sample-t-test                          |                  | K-S test     |
|                     |          |         |          |        | t-statistic                              | 95% CI           | KS-statistic |
| $\mathcal{R}_C$     | 2        | 1.1     | 1.44     | 0.559  | 48.673                                   | (0.5853, 0.6344) | 0.2721       |
| $\mathcal{P}_{A_h}$ | 0.00444  | 0.0019  | 0.0024   | 0.0018 | 44.06                                    | (0.0013, 0.0014) | 0.3007       |
| $\mathcal{P}_{I_h}$ | 0.00534  | 0.00537 | 0.0014   | 0.001  | 72.689                                   | (0.0039, 0.0041) | 0.4904       |
| $\mathcal{P}_{I_v}$ | 0.0519   | 0.0424  | 0.016    | 0.0088 | 83.271                                   | (0.0365, 0.0382) | 0.6211       |

**Table 9.** Statistical estimates of quantities,  $\mathcal{R}_C$ ,  $\mathcal{P}_{A_h}$ ,  $\mathcal{P}_{I_h}$ , and  $\mathcal{P}_{I_v}$ , for VL in Sudan and India using the 2 sample t-test and two-sample Kolmogorov–Smirnov test. All analysis were found to be significant, i.e.  $p < 0.05$ .

| India        |                         |      | Sudan        |                         |  |
|--------------|-------------------------|------|--------------|-------------------------|--|
| Parameter    | PRCC( $\mathcal{R}_C$ ) | Rank | Parameter    | PRCC( $\mathcal{R}_C$ ) |  |
| $\theta_h$   | -0.8867                 | 1    | $\beta_{hv}$ | 0.8829                  |  |
| $\ell$       | 0.8279                  | 2    | $b$          | 0.8677                  |  |
| $\beta_{vh}$ | 0.8025                  | 3    | $\theta_h$   | -0.8673                 |  |
| $\beta_{hv}$ | 0.7729                  | 4    | $\beta_{vh}$ | 0.8480                  |  |
| $b$          | 0.5715                  | 5    | $\ell$       | 0.7052                  |  |
| $\mu_v$      | -0.5051                 | 6    | $\mu_v$      | -0.4017                 |  |
| $\phi_h$     | 0.0247*                 | 7    | $\phi_h$     | 0.0243*                 |  |
| $\mu_h$      | 0.0157*                 | 8    | $\mu_h$      | -0.0236*                |  |

**Table 10.** A comparison of the partial rank correlation coefficients for input parameters of the output value ( $\mathcal{R}_C$ ), where (\*) denotes  $p < 0.01$ . for India and Sudan.

## 415 5 Discussion

416 The regional risk factors associated with VL are complex and ambiguous. In face of this uncertainty  
417 systematic evaluation of ongoing VL control programs is essential but it remains challenging, as appro-  
418 priate measures of long-term success (where success correspond primarily to no locally acquired cases)  
419 with response to changing environmental and political platforms are needed. The objectives of this  
420 systematic mathematical analysis is to identify and classify risk factors for India and Sudan using the  
421 best available field evidence and data. It will help in determining the gaps in existing knowledge and  
422 control and optimally allocating limited resources of the regions. Literature searches were carried out  
423 using public health databases, cross sectional and cohort studies, government reports, and information  
424 from patients at Rajendra Memorial Institute of Medical Sciences. Due to the limited longitudinal data  
425 and no publications with information on comparisons between regions, consistent results could not be  
426 found and hence uncertainty and sensitivity analysis help was taken to magnify and identify the missing  
427 piece. Most data studies in the literature did not describe information on the criteria of selection of  
428 participants in sufficient detail, controlled for confounding variables, or used only one diagnostic test as  
429 proof of infection, hence in this study we used multiple data sets to obtained ranges of the parameters.

430 This is the first study to best of our knowledge that review and make use of extensive collection of  
431 available data on epidemiological and ecological parameters to understand the dynamics of the Visceral  
432 Leishmaniasis (VL) and identify risk factors in India and Sudan using mathematical modeling approach.  
433 The study compares and contrasts quantities from two nations where the disease is endemic and spread  
434 via the same VL parasite species and hosts. The sources of the data were used to estimate parameters  
435 and uncertainty and sensitivity analysis was conducted on the model's outcome. Parameter estimates  
436 were restricted specifically to India and Sudan to measure the current level of endemicity of VL in both  
437 nations. The dynamics of the model depends on the VL basic and control reproductive numbers ( $\mathcal{R}_0$ ) and  
438 ( $\mathcal{R}$ ), which measures the likelihood and severity of an outbreak. The estimated value of the VL control  
439 reproductive number is found to be twice for India(2.1) as compared with Sudan(1.3). Uncertainty  
440 analysis on the  $\mathcal{R}_C$  also showed that there were eight parameters (see Table 2) that should be taken  
441 into consideration when assessing the uncertainty associated with the risk of increasing levels of VL. The  
442 parameter sensitivity analysis  $\mathcal{R}_C$  suggests that the biting rate, the average number of vectors per person  
443 in a given day, the probability of infection transmission between vector and humans, and the treatment  
444 rate were the most influential parameters in the complex disease transmission cycle between sand flies  
445 and humans for both countries. However, the order of parameter sensitivity differ between India and  
446 Sudan. The biting rate, of the *P. Argentipes* in India and the *P. Orientalis* in Sudan were also shown to  
447 be the highest contributing factor to the disease's severity. Hence, controls reducing the biting rate may  
448 be the most effective in controlling VL.

449 In India the *P. Argentipes* is the main sand fly species responsible for transmission of VL to human  
450 populations. During 1960's the man-biting rate of sand flies was significantly reduced from DDT spraying  
451 applications that were employed in the malaria eradication campaign and designed to kill mosquito  
452 vectors. This campaign reduced the number of VL cases during this period (1962-1963,) showing no new  
453 prorated cases. It was observed that soon after the DTT spraying campaign stopped the number of VL  
454 cases were elevated to higher epidemic levels [5]. High treatment rate is also found to be a critical factor  
455 in impacting the dynamics of VL but primarily in India. However, we assumed effective treatment for all  
456 individuals in the model and did not consider efficacy and toxicity of available drugs. These assumptions  
457 may influence our findings.

458 This is an attempt to understand the collective impact of some risk factors contributing to the VL  
459 burden in two distinct geographical regions. The results are based on model's parameter estimates  
460 collected and estimated from the available VL data reports. The study was limited to the particular  
461 regions of interest as well as to the time period in which data are obtained to estimate some of the  
462 parameter estimates from literature were established. As with similar studies, this research also had  
463 some limitations. For instance the data used came from various sub-regions and during different time



464 periods and therefore may not be a representative of the country. However, the study clearly identifies  
465 the type of data that are relevant and needs to be collected for thoroughly understanding of VL dynamics.  
466 In our future research, we plan to provide elaborate analytical methods for the estimation of partially  
467 observed data (usually temporal incidence data) for the two developing countries.

## 468 **Author Contributions**

## 469 **Acknowledgements**

470 The study is supported by grants from the National Science Foundation (NSF - Grant DMS-1263374 and  
471 0838705), the National Security Agency (NSA - Grant H98230-13-1-0261 and the Office of the Provost of  
472 Arizona State University. The first author would like to thank Ridouan Bani for assistance in program-  
473 ming as well as Sherry Towers and Gerardo Chowell for their helpful suggestions and recommendations  
474 on parameter estimation.

## 475 References

- 476 1. Indu B Ahluwalia, Caryn Bern, Yukiko Wagatsuma, Cristiane Costa, Rajib Chowdhury, Mustakim  
477 Ali, Josef Amann, Rashidul Haque, Robert Breiman, and James H Maguire. Visceral leishmaniasis:  
478 consequences to women in a bangladeshi community. *Journal of Women's Health*, 13(4):360–364,  
479 2004.
- 480 2. Indu B IB Ahluwalia, Caryn C Bern, Cristiane C Costa, Tangin T Akter, Rajib R Chowdhury,  
481 Mustakim M Ali, Didarul D Alam, Eben E Kenah, Josef J Amann, Meghla M Islam, Yukiko Y  
482 Wagatsuma, Rashidul R Haque, Robert F RF Breiman, and James H JH Maguire. Visceral  
483 leishmaniasis: consequences of a neglected disease in a Bangladeshi community. *The American*  
484 *Journal of Tropical Medicine and Hygiene*, 69(6):624–628, December 2003.
- 485 3. Jorge Alvar, Seife Bashaye, Daniel Argaw, Israel Cruz, Pilar Aparicio, Askal Kassa, Giannos  
486 Orfanos, Fernando Parreño, Olusegan Babaniyi, Nigussu Gudeta, Carmen Cañavate, and Caryn  
487 Bern. Kala-azar outbreak in libo kemkem, ethiopia: Epidemiologic and parasitologic assessment.  
488 *The American Journal of Tropical Medicine and Hygiene*, 77(2):275–282, 2007.
- 489 4. Jorge Alvar, Iván D. Vélez, Caryn Bern, Mercé Herrero, Philippe Desjeux, Jorge Cano, Jean  
490 Jannin, Margriet den Boer, and the WHO Leishmaniasis Control Team. Leishmaniasis worldwide  
491 and global estimates of its incidence. *PLoS ONE*, 7(5):e35671 EP –, 05 2012.
- 492 5. Jorge Alvar, Iván D. Vélez, Caryn Bern, Mercé Herrero, Philippe Desjeux, Jorge Cano, Jean  
493 Jannin, Margriet den Boer, and the WHO Leishmaniasis Control Team. Leishmaniasis worldwide  
494 and global estimates of its incidence: Text s43. leishmaniasis country profiles, india. *PLoS ONE*,  
495 7(5):e35671, 05 2012.
- 496 6. Jorge Alvar, Iván D. Vélez, Caryn Bern, Mercé Herrero, Philippe Desjeux, Jorge Cano, Jean  
497 Jannin, Margriet den Boer, and the WHO Leishmaniasis Control Team. Leishmaniasis worldwide  
498 and global estimates of its incidence: Text s81, leishmaniasis country profiles, south sudan. *PLoS*  
499 *ONE*, 7(5):e35671, 05 2012.
- 500 7. Caryn Bern, Allen W Hightower, Rajib Chowdhury, Mustakim Ali, Josef Amann, Yukiko Wagat-  
501 suma, Rashidul Haque, Katie Kurkjian, Louise E Vaz, Moarrita Begum, Tangin Akter, Catherine B  
502 Cetre-Sossah, Indu B Ahluwalia, Ellen Dotson, W Evan Secor, Robert F Breiman, and James H  
503 Maguire. Risk factors for kala-azar in bangladesh. *Emerging infectious diseases*, 11(5):655–662, 00  
504 2005.
- 505 8. Caryn Bern, James H Maguire, and Jorge Alvar. Complexities of assessing the disease burden  
506 attributable to leishmaniasis. *Plos Neglected Tropical Diseases*, 2(10):e313, 2008.
- 507 9. Tapan Bhattacharyya, Duncan E. Bowes, Sayda El-Safi, Shyam Sundar, Andrew K. Falconar,  
508 Om Prakash Singh, Rajiv Kumar, Osman Ahmed, Marleen Boelaert, and Michael A. Miles. Signif-  
509 icantly lower anti-*Leishmania* igg responses in sudanese versus indian visceral leishmaniasis. *PLoS*  
510 *Negl Trop Dis*, 8(2):e2675, 02 2014.
- 511 10. Garrett Birkhoff and Gian-Carlo Rota. *Ordinary Differential Equations*. John Wiley & Sons, 4  
512 edition, January 1989.
- 513 11. S M Blower and H Dowlatabadi. Sensitivity and Uncertainty Analysis of Complex Models of  
514 Disease Transmission: An HIV Model, as an Example. *International Statistical Review / Revue*  
515 *Internationale de Statistique*, 62(2):229, August 1994.

- 516 12. Fred Brauer and Carlos Castillo-Chavez. *Mathematical Models in Population Biology and Epi-*  
517 *demiology*, volume 40 of *Texts in Applied Mathematics*. Springer New York, 2nd edition, November  
518 2012.
- 519 13. Fred Brauer, Carlos Castillo-Chávez, Elmer De La Pava, Kamal Barley, Carlos W Castillo-Garsow,  
520 Diego Chowell, Baltazar Espinoza, Gonzalez Paula Parra, Carlos Hernandez Suarez, and Victor M  
521 Moreno. *Modelos De La Propagación De Enfermedades Infecciosas*. Universidad Autónoma de  
522 Occidente, Cali, Colombia, 12 2014.
- 523 14. RS Bray, KP Chang, et al. Immunodiagnosis of leishmaniasis. *Leishmaniasis. (Human Parasitic*  
524 *Diseases Vol. 1.)*, pages 177–182, 1985.
- 525 15. Bruno Bucheton, Musa Mohamed Kheir, Sayda Hassan El-Safi, Awad Hammad, Adil Mergani,  
526 Charles Mary, Laurent Abel, and Alain Dessein. The interplay between environmental and host  
527 factors during an outbreak of visceral leishmaniasis in eastern sudan. *Microbes and Infection*,  
528 4(14):1449 – 1457, November 2002.
- 529 16. C Castillo-Chavez and H Thieme. Asymptotically autonomous epidemic models. In Ovide Arino,  
530 David E. Axelrod, and Marek Kimmel, editors, *Mathematical Population Dynamics: Analysis of*  
531 *Heterogeneity*, volume 1 of *Theory of Epidemics*, pages 33–50. Wuerz, Winnipeg, 1995.
- 532 17. François Chappuis, Shyam Sundar, Asrat Hailu, Hashim Ghalib, Suman Rijal, Rosanna W Peeling,  
533 Jorge Alvar, and Marleen Boelaert. Visceral leishmaniasis: what are the needs for diagnosis,  
534 treatment and control? *Nature reviews. Microbiology*, 5(11):873–882, 00 2007.
- 535 18. Simon Collin, Robert Davidson, Koert Ritmeijer, Kees Keus, Yosef Melaku, Sammy Kipngetch,  
536 and Clive Davies. Conflict and kala-azar: determinants of adverse outcomes of kala-azar among  
537 patients in southern Sudan. *Clinical Infectious Diseases*, 38(5):612–619, March 2004.
- 538 19. P Desjeux. Leishmaniasis: current situation and new perspectives. *Comparative immunology,*  
539 *microbiology and infectious diseases*, 27(5):305–318, September 2004.
- 540 20. O. Diekmann and J. A. P. Heesterbeek. *Mathematical Epidemiology of Infectious Diseases: Model*  
541 *Building, Analysis and Interpretation*, volume 5 of *Wiley series in mathematical and computational*  
542 *biology*. Chichester ; New York John Wiley, illustrated, reprint edition, 2000.
- 543 21. Erin Dilger. *The effects of host-vector relationships and density dependence on the epidemiology of*  
544 *visceral leishmaniasis*. PhD thesis, University of Warwick, Coventry, CV4 7AL, UK, 01 2013.
- 545 22. D S DS Dinesh, A A Ranjan, A A Palit, K K Kishore, and S K SK Kar. Seasonal and nocturnal  
546 landing/biting behaviour of Phlebotomus argentipes (Diptera: Psychodidae). *Annals of Tropical*  
547 *Medicine and Parasitology*, 95(2):197–202, March 2001.
- 548 23. C Dye. The logic of visceral leishmaniasis control. *The American journal of tropical medicine and*  
549 *hygiene*, 55(2):125–130, August 1996.
- 550 24. C. Dye, R. Killick-Kendrick, M. M. Vitutia, R. Walton, M. Killick-Kendrick, A. E. Harith, M. W.  
551 Guy, M.-C. Cañavate, and G. Hasibeder. Epidemiology of canine leishmaniasis: prevalence, inci-  
552 dence and basic reproduction number calculated from a cross-sectional serological survey on the  
553 island of gozo, malta. *Parasitology*, 105:35–41, 7 1992.
- 554 25. C C Dye. Leishmaniasis epidemiology: the theory catches up. *Parasitology*, 104 Suppl:S7–18,  
555 January 1992.

- 556 26. Ibrahim M ELmojtaba, J Y T Mugisha, and Mohsin H A Hashim. Mathematical analysis of the dy-  
557 namics of visceral leishmaniasis in the Sudan. *Applied Mathematics and Computation*, 217(6):2567–  
558 2578, 2010.
- 559 27. D. A. Elnaiem, A. M. Elnahas, and M. A. Aboud. Protective efficacy of lambda-cyhalothrin-  
560 impregnated bednets against phlebotomus orientalis, the vector of visceral leishmaniasis in sudan.  
561 *Medical and Veterinary Entomology*, 13(3):310–314, 1999.
- 562 28. D. A. Elnaiem, H. K. Hassan, and R. D. Ward. Associations of phlebotomus orientalis and other  
563 sandflies with vegetation types in the eastern sudan focus of kala-azar. *Medical and Veterinary*  
564 *Entomology*, 13(2):198–203, 1999.
- 565 29. D A Elnaiem, M M Hassan, R Maingon, G H Nureldin, A M Mekawi, M Miles, and R D Ward.  
566 The egyptian mongoose, herpestes ichneumon, is a possible reservoir host of visceral leishmaniasis  
567 in eastern sudan. *Parasitology*, 122(5):531–536, 2001.
- 568 30. D A Elnaiem, R D Ward, H K Hassan, M A Miles, and I A Frame. Infection rates of Leishmania  
569 donovani in Phlebotomus orientalis from a focus of visceral leishmaniasis in eastern Sudan. *Annals*  
570 *of Tropical Medicine and Parasitology*, 92(2):229–232, March 1998.
- 571 31. Dia-Eldin A. Elnaiem. Ecology and control of the sand fly vectors of leishmania donovani in east  
572 africa, with special emphasis on phlebotomus orientalis. *Journal of Vector Ecology*, 36:S23–S31,  
573 March 2011.
- 574 32. Dia-Eldin A. E. Elnaiem, Hassan K. Hassan, Omran F. Osman, Rhayza Dc Maingon, Robert  
575 Killeck-Kendrick, and Richard D. Ward. A possible role for phlebotomus (anaphlebotomus) rodhaini  
576 (parrot, 1930) in transmission of leishmania donovani. *Parasit Vectors*, 4:238, 2011.
- 577 33. Araya Gebresilassie, Oscar David Kirstein, Solomon Yared, Essayas Aklilu, Aviad Moncaz, Habte  
578 Tekie, Meshesha Balkew, Alon Warburg, Asrat Hailu, and Teshome Gebre-Michael. Nocturnal  
579 periodicity of phlebotomus (larrousius) orientalis (diptera: Psychodidae) in an endemic focus of  
580 visceral leishmaniasis in northern ethiopia. *Parasites & Vectors*, 8(1):186, 2015.
- 581 34. André Griekspoor, Egbert Sondorp, and Theo Vos. Cost-effectiveness analysis of humanitarian  
582 relief interventions: Visceral leishmaniasis treatment in the sudan. *Health Policy and Planning*,  
583 14(1):70–76, 1999.
- 584 35. “The World Bank Group”. World databank: World development indicators - india. Online, May  
585 2015.
- 586 36. “The World Bank Group”. World databank: World development indicators - sudan. Online, May  
587 2015.
- 588 37. A Hailu, M Gramiccia, and P A Kager. Visceral leishmaniasis in Aba-Roba, south-western Ethiopia:  
589 prevalence and incidence of active and subclinical infections. *Ann Trop Med Parasitol*, 103(8):659–  
590 670, December 2009.
- 591 38. M Hassan, Ahmed M Elhassan, Ahmed M Musa, Omran F Osman, Fathi MA El-Raba’a, Meshesha  
592 Balkew, and Ibrahim M Elhassan. Establishment and maintenance of a laboratory colony of  
593 the sandfly Phlebotomus orientalis (Diptera: Psychodidae), the vector of visceral leishmaniasis in  
594 Sudan. *Khartoum Medical Journal*, 3(2), 2010.
- 595 39. M M Hassan, E M Elamin, and M M Mukhtar. Isolation and identification of Leishmania donovani  
596 from Phlebotomus orientalis, in an area of eastern Sudan with endemic visceral leishmaniasis.  
597 *Annals of Tropical Medicine and Parasitology*, 102(6):553–555, September 2008.

- 598 40. M. M. Hassan, F. M. A. Elraba'a, R. D. Ward, R. D. C. Maingon, and D. A. Elnaiem. Detection  
599 of high rates of in-village transmission of leishmania donovani in eastern sudan. *Acta Tropica*,  
600 92(1):77–82, 2004.
- 601 41. J. A. P. Heesterbeek and K. Dietz. The concept of  $r_0$  in epidemic theory. *Statistica Neerlandica*,  
602 50(1):89–110, 1996.
- 603 42. Moazzem Hossain and Kazi M. Jamil. Geographical distribution of kala-azar in south asia. In T.K.  
604 Jha and E. Noiri, editors, *Kala Azar in South Asia*, chapter 1, pages 3–9. Springer Netherlands,  
605 2011.
- 606 43. Adolf Hurwitz. On the Conditions Under Which an Equation Has Only Roots With Negative Real  
607 Parts. In Robert Bellman and Richard Kalaba, editors, *Selected Papers on Mathematical Trends*  
608 *in Control Theory*, pages 273–284. Dover Publications, 1964.
- 609 44. Ivy Hurwitz, Heidi Hillesland, Annabeth Fieck, Pradeep Das, and Ravi Durvasula. The para-  
610 transgenic sand fly: a platform for control of Leishmania transmission. *Parasit Vectors*, 4:82–82,  
611 January 2011.
- 612 45. Anand B Joshi, Murari L Das, Shireen Akhter, Rajib Chowdhury, Dinesh Mondal, Vijay Kumar,  
613 Pradeep Das, Axel Kroeger, Marleen Boelaert, and Max Petzold. Chemical and environmental  
614 vector control as a contribution to the elimination of visceral leishmaniasis on the Indian subconti-  
615 nent: cluster randomized controlled trials in Bangladesh, India and Nepal. *BMC Medicine*, 7(1):54,  
616 2009.
- 617 46. C L Karp, S H el Safi, T A Wynn, M M Satti, A M Kordofani, F A Hashim, M Hag-Ali, F A Neva,  
618 T B Nutman, and D L Sacks. In vivo cytokine profiles in patients with kala-azar. Marked elevation  
619 of both interleukin-10 and interferon-gamma. *The Journal of clinical investigation*, 91(4):1644–  
620 1648, April 1993.
- 621 47. Ozge Erisoz Kasap and Bulent Alten. Comparative demography of the sand fly phlebotomus  
622 papatasi (diptera: Psychodidae) at constant temperatures. *Journal of vector ecology : journal of*  
623 *the Society for Vector Ecology*, 31(2):378–385, 00 2006.
- 624 48. E. A. G. Khalil, A. M. El Hassan, E. E. Zijlstra, M. M. Mukhtar, H. W. Ghalib, B. Musa, M. E.  
625 Ibrahim, A. A. Kamil, M. Elsheikh, A. Babiker, and F. Modabber. Autoclaved leishmania major  
626 vaccine for prevention of visceral leishmaniasis: A randomised, double-blind, bcg-controlled trial  
627 in sudan. *The Lancet*, 356(9241):1565–1569, 11 2000.
- 628 49. E A G Khalil, A M Musa, S H H Elgawi, A Meshasha, I Gamar Eldawla, M O Elhassan, K A  
629 Eljaleel, B M Younis, M E E Elfaki, and A M El-Hassan. Revival of a focus of visceral leishmaniasis  
630 in central sudan. *Ann Trop Med Parasitol*, 102(1):79–80, Jan 2008.
- 631 50. R. Killick Kendrick, William H. R. Lumsden, and D. A. Evans. Biology of leishmania in phle-  
632 botomine sandflies. In W. H. R. Lumsden and D. A. Evans, editors, *Biology of the Kinetoplastida*,  
633 volume 2, chapter 8, pages 395–460. Academic Press, London–New York, 1 edition, 1979.
- 634 51. R P Lane, M M Pile, and F P Amerasinghe. Anthropophagy and aggregation behaviour of the  
635 sandfly Phlebotomus argentipes in Sri Lanka. *Medical and Veterinary Entomology*, 4(1):79–88,  
636 January 1990.
- 637 52. J P LaSalle and Z Artstein. *The Stability of Dynamical Systems*. CBMS-NSF Regional Conference  
638 Series in Applied Mathematics. Society for Industrial and Applied Mathematics, 1976.

- 639 53. Alun L Lloyd, Ji Zhang, and AMorgan Root. Stochasticity and heterogeneity in host–vector models.  
640 *Journal of the Royal Society Interface*, 4(16):851–863, 10 2007.
- 641 54. Simeone Marino, Ian B Hogue, Christian J Ray, and Denise E Kirschner. A methodology for  
642 performing global uncertainty and sensitivity analysis in systems biology. *Journal of theoretical*  
643 *biology*, 254(1):178–196, September 2008.
- 644 55. M D McKay, R J Beckman, and W J Conover. A Comparison of Three Methods for Selecting Values  
645 of Input Variables in the Analysis of Output from a Computer Code. *Technometrics*, 21(2):239,  
646 May 1979.
- 647 56. Yosef Melaku, Simon M. Collin, Kees Keus, Francis Gatluak, Koert Ritmeijer, and Robert N.  
648 Davidson. Treatment of kala-azar in southern sudan using a 17-day regimen of sodium stiboglu-  
649 conate combined with paromomycin: A retrospective comparison with 30-day sodium stiboglu-  
650 conate monotherapy. *The American Journal of Tropical Medicine and Hygiene*, 77(1):89–94, 2007.
- 651 57. Anuj Mubayi, Carlos Castillo-Chavez, Gerardo Chowell, Christopher Kribs-Zaleta, Niyamat  
652 Ali Siddiqui, Narendra Kumar, and Pradeep Das. Transmission dynamics and underreporting  
653 of kala-azar in the indian state of bihar. *Journal of Theoretical Biology*, 262(1):177–185, 00 2010.
- 654 58. A. K. Mukhopadhyay and R. N. Mishra. Development of leishmania donovani in phlebotomus  
655 argentipes and ph. papatasi fed on kala-azar patients in bihar. *Indian Journal of Medical Research*  
656 *- Section A Infectious Diseases*, 93(MAY):152–154, 1991.
- 657 59. J. L. Nyungura, V. C. S. Nyambati, M. Muita, and E. Muchiri. Risk factors for the transmission  
658 of kala-azar in fangak, south sudan. *Southern Sudan Medical Journal*, 4(2):26–29, May 2011.
- 659 60. Ad Hoc Committee on Health Research Relating to Future Intervention Options. Investing in  
660 health research and development: Report of the ad hoc committee on health research relating to  
661 future intervention options, convened under the auspices of the world health organization. Technical  
662 Report TDR/ Gen/96.1, Cornell University, Geneva, Switzerland, September 1996.
- 663 61. World Health Organization et al. Leishmaniasis: magnitude of the problem. *World Health Orga-*  
664 *nization, Geneva*, 2009.
- 665 62. World Health Organization(WHO). Visceral leishmaniasis therapy: statement on the outcome of  
666 a meeting. *Madrid*, 9 2009.
- 667 63. Bart Ostyn, Kamlesh Gidwani, Basudha Khanal, Albert Picado, François Chappuis, Shri Prakash  
668 Singh, Suman Rijal, Shyam Sundar, and Marleen Boelaert. Incidence of symptomatic and asymp-  
669 tomatic *leishmania donovani* infections in high-endemic foci in india and nepal: A  
670 prospective study. *PLoS Negl Trop Dis*, 5(10):e1284, 10 2011.
- 671 64. B. R. Paiva, A. G. Oliveira, M. E. M. C. Dorval, E. A. B. Galati, and R. S. Malafrente. Species-  
672 specific identification of leishmania in naturally infected sand flies captured in mato grosso do sul  
673 state, brazil. *Acta Tropica*, 115(1-2):126–130, 2010.
- 674 65. Anup Palit, Sujit Kumar Bhattacharya, and Sachinandan Kundu. Gonotrophic cycle and age  
675 gradation of phlebotomus argentipes in west bengal, india. In Prof. P. K. Bandyopadhyay, editor,  
676 *Proceedings Of The 22Nd National Congress On Parasitology*, Advances in Parasitology : A Novel  
677 Approach Towards a Disease Free World, pages 10–17, Kalyani–741235 West Bengal, India, 00  
678 2011. Department Of Zoology University Of Kalyani.



- 679 66. D. M. Pigott, S. Bhatt, N. Golding, K. A. Duda, K. E. Battle, O. J. Brady, J. P. Messina, Y. Balard,  
680 P. Bastien, F. Pratlong, J. S. Brownstein, C. C. Freifeld, S. R. Mekaru, P. W. Gething, D. B. George,  
681 M. F. Myers, R. Reithinger, and S. I. Hay. Global distribution maps of the leishmaniasis. *eLife*  
682 *Sciences Publications Limited*, 3, 06 2014.
- 683 67. Amber Read, Ivy Hurwitz, and Ravi Durvasula. Leishmaniasis: An Update on a Neglected Tropical  
684 Disease. In Vadrevu Sree Hari Rao and Ravi Durvasula, editors, *Dynamic Models of Infectious*  
685 *Diseases*, pages 95–138. Springer New York, 2013.
- 686 68. Richard Reithinger, Simon Brooker, and Jan H. Kolaczinski. Visceral leishmaniasis in eastern  
687 africa – current status. *Transactions of The Royal Society of Tropical Medicine and Hygiene*,  
688 101(12):1169–1170, 2007.
- 689 69. L. S. Rocha, A. Falqueto, C. B. dos Santos, A. L. Ferreira, G. C. da Graça, G. Grimaldi, and  
690 E. Cupolillo. Survey of natural infection by leishmania in sand fly species collected in southeastern  
691 brazil. *Transactions of the Royal Society of Tropical Medicine and Hygiene*, 104(7):461–466, 2010.
- 692 70. Nermin Sakru, Metin Korkmaz, Yusuf Ozbek, Hatice Ertabaklar, Mustafa Sengul, and Seray Ozen-  
693 soy Toz. Investigation of asymptomatic visceral leishmaniasis cases using western blot in an endemic  
694 area in turkey. *The new microbiologica*, 30(1):13–18, 00 2007.
- 695 71. L. Sánchez-García, M. Berzunza-Cruz, I. Becker-Fauser, and E. A. Rebollar-Téllez. Sand flies  
696 naturally infected by leishmania (l.) mexicana in the peri-urban area of chetumal city, quintana  
697 roo, méxico. *Transactions of the Royal Society of Tropical Medicine and Hygiene*, 104(6):406–411,  
698 2010.
- 699 72. Judith A. Schorscher and Marga Goris. Incrimination of phlebotomus (larrousius) orientalis as  
700 a vector of visceral leishmaniasis in western upper Nile province, southern Sudan. *Transactions of*  
701 *The Royal Society of Tropical Medicine and Hygiene*, 86(6):622–623, 1992.
- 702 73. J Seaman, A J Mercer, H E Sondorp, and B L Herwaldt. Epidemic visceral leishmaniasis in  
703 southern Sudan: treatment of severely debilitated patients under wartime conditions and with  
704 limited resources. *Annals of internal medicine*, 124(7):664–672, April 1996.
- 705 74. Umakant Sharma and Sarman Singh. Insect vectors of Leishmania: distribution, physiology and  
706 their control. *Journal of vector borne diseases*, 45(4):255–272, December 2008.
- 707 75. G. S. Shukla and V. B. Upadhyay. *Economic Zoology*, chapter 5, pages 70–71. Rastogi Publications,  
708 Meerut, India, 4 edition, 2009.
- 709 76. Narendra Srivastava, Brajesh Kumar Singh, and Archana Yadav. Survey report of visceral leish-  
710 maniasis based on serodiagnostic test in madhepura district of Bihar, India. *National Academy*  
711 *Science Letters*, 37(6):487–492, 2014.
- 712 77. Anette Stauch, Ram Rup Sarkar, Albert Picado, Bart Ostyn, Shyam Sundar, Suman Rijal, Mar-  
713 leen Boelaert, Jean-Claude Dujardin, and Hans-Peter Duerr. Visceral leishmaniasis in the Indian  
714 subcontinent: Modelling epidemiology and control. *PLoS Negl Trop Dis*, 5(11):e1405, 11 2011.
- 715 78. Anette A Stauch, Hans-Peter HP Duerr, Jean-Claude JC Dujardin, Manu M Vanaerschot, Shyam S  
716 Sundar, and Martin M Eichner. Treatment of Visceral Leishmaniasis: Model-Based Analyses on  
717 the Spread of Antimony-Resistant *L. donovani* in Bihar, India. *PLoS Neglected Tropical Diseases*,  
718 6(12):e1973–e1973, December 2012.
- 719 79. A Sud, N Varma, R K Marwaha, F M Patel, A Trehan, S Singh, and S Varma. Visceral leishmaniasis  
720 in a non-endemic area of India. *Tropical doctor*, 34(4):247–249, October 2004.



- 721 80. Shyam Sundar and Jaya Chakravarty. Visceral leishmaniasis. In Alicia Ponte-Sucre, Emilia Diaz,  
722 and Maritza Padrón-Nieves, editors, *Drug Resistance in Leishmania Parasites, Consequences,*  
723 *Molecular Mechanisms and Possible Treatments*, pages 183–198. Springer Vienna, 1 edition, 2013.
- 724 81. M. Svobodová, B. Alten, L. Zídková, V. Dvořák, J. Hlavačková, J. Myšková, V. Šeblová, O. E.  
725 Kasap, A. Belen, J. Votýpka, and P. Volf. Cutaneous leishmaniasis caused by leishmania infantum  
726 transmitted by phlebotomus tobbi. *International Journal for Parasitology*, 39(2):251–256, 2009.
- 727 82. Puja Tiwary, Dinesh Kumar, Mukesh Mishra, Rudra Pratap Singh, Madhukar Rai, and Shyam  
728 Sundar. Seasonal variation in the prevalence of sand flies infected with *Leishmania donovani*.  
729 *PLoS ONE*, 8(4):e61370 EP –, 04 2013.
- 730 83. Roshan K Topno, Vidya N R Das, Alok Ranjan, Krishna Pandey, Dharmender Singh, Nawin Ku-  
731 mar, Niyamat A Siddiqui, Vijay P Singh, Shreekant Kesari, Narendra Kumar, Sanjeev Bimal,  
732 Annadurai Jeya Kumar, Chetram Meena, Ranjeet Kumar, and Pradeep Das. Asymptomatic infec-  
733 tion with visceral leishmaniasis in a disease-endemic area in bihar, india. *The American Journal*  
734 *of Tropical Medicine and Hygiene*, 83(3):502–506, 00 2010.
- 735 84. P. van den Driessche and James Watmough. Reproduction numbers and sub-threshold endemic  
736 equilibria for compartmental models of disease transmission. *Mathematical Biosciences*, 180(1–  
737 2):29–48, 2002/12// 2002.
- 738 85. Jorge X Velasco-Hernandez and Carlos Castillo-Chavez. Modelling vector-host disease transmission  
739 and food web dynamics through the mixing/pair formation approach. In V. Lakshmikantham,  
740 editor, *World Congress of Nonlinear Analysts '92*, volume 1 of *Proceedings of the First World*  
741 *Congress of Nonlinear Analysts, Tampa, Florida, August 19-26, 1992*, pages 3175–3186. Walter de  
742 Gruyter & Co., Berlin, Boston: DE GRUYTER, August 1996.
- 743 86. Sally Osman SO Widaa, Khalid Awadelkarim KA Ahmed, Amel Ahmed Elsheikh AA Bari, Mayada  
744 Mohmmedelhassan MM Ali, Mihad Abdelaal MA Ibrahim, Mohammed Ahmed MA Bashir, Ahmed  
745 Hamid Awadelkarim AH Mastour, Zakkiah Algali ZA Yagi, and Mo'awia Mukhtar MM Hassan.  
746 Sandflies (Diptera: Psychodidae) in a focus of visceral leishmaniasis in White Nile, Sudan. *Memo-*  
747 *rias do Instituto Oswaldo Cruz*, 107(4):470–475, June 2012.
- 748 87. Marjorie J Wonham, Mark A Lewis, Joanna Renclawowicz, and P Van den Driessche. Transmission  
749 assumptions generate conflicting predictions in host–vector disease models: a case study in west  
750 nile virus. *Ecology letters*, 9(6):706–725, 2006.
- 751 88. Laith Yakob. How do biting disease vectors behaviourally respond to host availability? *Parasites*  
752 *& vectors*, 9(1):468, 2016.

## 753 Supporting information

### 754 A Complete Model Derivation

755 The dynamics of *Leishmania donovani* transmission in humans and sandflies are modeled by the system of  
 756 equations given by model (1)–(2) in which the force of infection is modeled by Equation C. Newly infected  
 757 but not yet infectious individuals move into the asymptomatic population (sub-clinical infection, exposed  
 758 to VL but not yet infectious), who may exit the system through natural death or through progress to  
 759 clinical VL. The change in  $A_h$  population is

$$\frac{dA_h}{dt} = \lambda_{vh}S_h - (\phi_h + \mu_h)A_h.$$

760 The asymptomatic can then progress to a VL clinical symptoms stage ( $I_h$ ) at the rate  $\phi_h$ :

$$\frac{dI_h}{dt} = \phi_h A_h - (\mu_h + \theta_h)I_h,$$

761 where  $\theta_h$  is the per-capita treatment rate and  $\mu_h$  is the per-capita departure rate. The infectious indi-  
 762 viduals with clinical symptoms may enter treatment ( $T_h$ ) at the rate  $\theta_h$ . Through successful treatment,  
 763 individuals recover at the rate  $\gamma_h$ , and hence

$$\frac{dT_h}{dt} = \theta_h I_h - (\gamma_h + \mu_h)T_h.$$

764 The population of recovered individuals from VL ( $R_h$ ) is increased following successful treatment, leading  
 765 to permanent immunity into the  $R_h$  class (at the rate  $\gamma_h$ ). The population is decreased by natural death  
 766 and is given by

$$\frac{dR_h}{dt} = \gamma_h T_h - \mu_h R_h.$$

767 The population of new female sandflies ( $S_v$ ) is increased by an adult recruitment rate ( $\lambda_v$ ) and decrease  
 768 by natural mortality ( $\mu_v$ ). The vector in this population can acquire the *L. Donovanii parasite* from an  
 769 infectious human at a rate  $\lambda_v$  and is modeled by Equation 4. The change in the susceptible population  
 770 is described by

$$\frac{dS_v}{dt} = \Lambda_v - \lambda_{hv}S_v - \mu_v S_v.$$

771 The population of infected female sandflies is generated at the per-capita rate  $\lambda_{hv}$  and diminished by the  
 772 natural death rate  $\mu_v$ . Thus,

$$\frac{dI_v}{dt} = \lambda_{hv}S_v - \mu_v I_v.$$

## 773 B Details of the Analytical Results of VL Model

### 774 B.1 Derivation of the Control Reproductive Number

For simplification, we let  $G_1 = \phi_h + \mu_h$ ,  $G_2 = \theta_h + \mu_h$  and  $G_3 = \gamma_h + \mu_h$ . Considering the infected sub-  
 populations  $I_h(t)$ ,  $A_h(t)$ , and  $I_v(t)$ , we let  $\mathcal{F}$  be the rate of new infections into the infected compartments  
 and  $\mathcal{V}$  be the rate of exit of humans into infected compartments:

$$\frac{d}{dt} \begin{bmatrix} A_h \\ I_h \\ I_v \end{bmatrix} = \mathcal{F} - \mathcal{V} = \begin{bmatrix} \frac{b\mu_{v,h}\beta_{vh}I_vS_h}{N_v} \\ 0 \\ \frac{b\beta_{hv}I_hS_v}{N_h} \end{bmatrix} - \begin{bmatrix} (\phi_h + \mu_h)A_h \\ -\phi_h A_h + (\theta_h + \mu_h)I_h \\ \mu_v I_v \end{bmatrix}. \quad (19)$$

775 We apply the next generation operator method presented in [84], where  $\mathcal{F}$  is considered to be the vector  
 776 of rates of inflow of new infections in each compartment and  $\mathcal{V} = \mathcal{V}^+ + \mathcal{V}^-$  is the vector of rates  
 777 transfer rates of individuals into and out of the infective compartments by all other processes. Taking  
 778 the Jacobian matrix of each vector with respect to each of the infectious classes and evaluating at  
 779  $E_0 = (\Lambda_h/\mu_h, 0, 0, 0, 0, \Lambda_v/\mu_v, 0)$  gives

$$\mathbf{F} = \begin{bmatrix} 0 & 0 & b m_{v:h} \beta_{vh} \\ 0 & 0 & 0 \\ 0 & \frac{b \beta_{hv} \Lambda_v \mu_h}{\Lambda_h \mu_v} & 0 \end{bmatrix} \quad \text{and} \quad \mathbf{V} = \begin{bmatrix} G_1 & 0 & 0 \\ -\phi_h & G_2 & 0 \\ 0 & 0 & \mu_v \end{bmatrix}. \quad (20)$$

780 Computing  $\mathbf{FV}^{-1}$ , we obtain

$$\mathbf{FV}^{-1} = \begin{bmatrix} 0 & 0 & \frac{b m_{v:h} \beta_{vh}}{\mu_v} \\ 0 & 0 & 0 \\ \frac{b \beta_{hv} \Lambda_v \mu_h \phi_h}{\mu_v \Lambda_h G_1 G_2} & \frac{b \beta_{hv} \Lambda_v \mu_h}{\mu_v \Lambda_h G_2} & 0 \end{bmatrix}. \quad (21)$$

781 Taking the spectral radius of the next generation matrix operator,  $\rho(\mathbf{FV}^{-1})$ , gives

$$\mathcal{R}_C = \rho(\mathbf{FV}^{-1}) = \sqrt{\frac{b \beta_{hv}}{\mu_v} \cdot \frac{b \beta_{vh} \phi_h}{(\phi_h + \mu_h)(\theta_h + \mu_h)}} \cdot m_{v:h}. \quad (22)$$

## 782 B.2 Positivity and Boundedness of Solutions

783 Since this model is of epidemiological relevance, all its associated parameters are non-negative. Further,  
 784 the following non-negativity result holds. The state variables of the model (1) are non-negative for all  
 785 time, so solutions are positively invariant in  $\Omega = \Omega_h \times \Omega_v$ , where

$$\begin{aligned} \Omega_h &= \left\{ (S_h, A_h, I_h, T_h, R_h) \in \mathbb{R}_+^5 : S_h + A_h + I_h + T_h + R_h \leq \frac{\Lambda_h}{\mu_h} \right\}, \\ \Omega_v &= \left\{ (S_v, I_v) \in \mathbb{R}_+^2 : S_v + I_v \leq \frac{\Lambda_v}{\mu_v} \right\}. \end{aligned}$$

786 *Remark B.1.* If all initial conditions start in region  $\Omega = \Omega_h \times \Omega_v$ , then all corresponding solutions  
 787  $(S_h, A_h, I_h, T_h, R_h, S_v, I_v)'$  are non-negative for all  $t > 0$ , where  $'$  means vector transpose.

788 *Proof.* Because this model is of epidemiological relevance, we first show that the region  $\Omega$  is positively  
 789 invariant in  $\mathbb{R}_+^7$ , with respect to the system (1) and (2). It is easy to see that  $\dot{S}_h|_{S_h=0} > 0$ ,  $\dot{A}_h|_{A_h=0} >$   
 790  $0$ ,  $\dot{I}_h|_{I_h=0} > 0$ ,  $\dot{T}_h|_{T_h=0} > 0$ ,  $\dot{R}_h|_{R_h=0} > 0$ ,  $\dot{S}_v|_{S_v=0} > 0$ ,  $\dot{I}_v|_{I_v=0} > 0$ . Hence, all trajectories point to inside  
 791 the region  $\Omega$  (where the dot means derivative with respect to time). Also, the time derivative along all  
 792 solutions of (1) is

$$\begin{aligned} \frac{dN_h}{dt} &= \Lambda_h - N_h \mu_h \\ &\leq \Lambda_h - N_h \mu_h. \end{aligned}$$

793 It is clear that  $dN_h/dt < 0$  if  $N_h > \Lambda_h/\mu_h$ . Hence, on applying a (comparison) theorem from Birkhoff  
 794 and Rota ([10]) on differential inequality, we get

$$0 \leq N_h(t) \leq \frac{\Lambda_h}{\mu_h} + \left( N_h(0) - \frac{\Lambda_h}{\mu_h} \right) e^{-\mu_h t}.$$

795 When  $t \rightarrow \infty$ , then  $N_h < \Lambda_h/\mu_h$ . Thus, for initial conditions  $N_h(0) < \Lambda_h/\mu_h$ , we have  $N_h(t) < \Lambda_h/\mu_h$ .  
 796 Similarly, let  $(S_v, I_v) \in \mathbb{R}_+^2$  be the solution with non-negative initial solution. Taking the time  
 797 derivative along the sum of all solutions curves of model (2) gives

$$\begin{aligned} \frac{N_v}{dt} &= \Lambda_v - N_h\mu_h \\ &\leq \Lambda_v - N_h\mu_h. \end{aligned}$$

798 By differential inequality theorem in [10], we find

$$0 \leq N_v(t) \leq \frac{\Lambda_v}{\mu_v} + \left( N_v(0) - \frac{\Lambda_v}{\mu_v} \right) e^{-\mu_v t},$$

799 where  $N_v(0)$  represents the initial sandfly population at the initial phase of the disease. As  $t \rightarrow \infty$ , the  
 800 inequality becomes

$$0 \leq \lim_{t \rightarrow \infty} N_v(t) \leq \frac{\Lambda_v}{\mu_v}.$$

801 In particular, we have  $N_v(t) < \Lambda_v/\mu_v$  if  $N_v(0) < \Lambda_v/\mu_v$ . Hence the region  $\Omega$  is positively invariant.  
 802 Furthermore, if we start with initial conditions  $N_h(0) > \Lambda_h/\mu_h$  and  $N_v(0) > \Lambda_v/\mu_v$ , then either the  
 803 solutions enter  $\Omega$  in finite time or  $N_h(t) \rightarrow \Lambda_h/\mu_h$  and  $N_v(t) \rightarrow \Lambda_v/\mu_v$ , as  $t \rightarrow \infty$ .

804

805 Hence, for the model (1-2), the compact set  $\Omega$  is a positively invariant and absorbing set that attracts  
 806 all solutions of model (1-2) starting in  $\mathbb{R}_+^7$ .  $\square$

### 807 B.3 Stability Analysis of the Disease-Free Equilibrium Point (DFE)

#### 808 B.3.1 Local stability of the Endemic Equilibrium (DFE)

809 *Remark B.2.* The disease-free equilibrium point,  $E_0$ , of model system 1-2 is locally asymptotically stable  
 810 (LAS) if  $\mathcal{R}_C < 1$ , and unstable if  $\mathcal{R}_C > 1$ .

*Proof.* Linearization at DFE gives

$$J(E_0) = \begin{bmatrix} -\mu_h & 0 & 0 & 0 & 0 & 0 & -b\beta_{vh} \\ 0 & -G_1 & 0 & 0 & 0 & 0 & b\beta_{vh} \\ 0 & \phi_h & -G_2 & 0 & 0 & 0 & 0 \\ 0 & 0 & \theta_h & -G_3 & 0 & 0 & 0 \\ 0 & 0 & 0 & \gamma_h & -\mu_h & 0 & 0 \\ 0 & 0 & -\frac{b\beta_{hv}\Lambda_v\mu_h}{\mu_v\Lambda_h} & 0 & 0 & -\mu_v & 0 \\ 0 & 0 & \frac{b\beta_{hv}\Lambda_v\mu_h}{\mu_v\Lambda_h} & 0 & 0 & 0 & -\mu_v \end{bmatrix} \quad (23)$$

The characteristic polynomial of the Jacobian matrix  $J(E_0)$  is given by

$$P(\lambda) = (\lambda + \mu_v)(\lambda + \mu_h)^2(\lambda + G_3)(\lambda^3 + h_2\lambda^2 + h_1\lambda + h_0) \quad (24)$$

811 where  $h_0 = \mu_v(\phi_h + \mu_h)(\theta_h + \mu_h)(1 - \mathcal{R}_C^2)$ ,  $h_1 = (G_1 + G_2)\mu_v + G_1G_2$  and  $h_2 = G_2 + G_1 + \mu_v$ .  
 812 We observe that four eigenvalues for this polynomial have negative real parts, and are given by  $\lambda =$

813  $\{-\mu_v, -G_3, -\mu_h, -\mu_h\}$  with geometric multiplicity of two. The remaining expression is a cubic polyno-  
 814 mial,  $P(\lambda) = \lambda^3 + h_2\lambda^2 + h_1\lambda + h_0$ . Applying the Routh-Hurwitz criteria [43], we find the conditions for  
 815 all eigenvalues to have negative real parts, that is  $H_1 = h_1 > 0$ ,  $H_2 = h_0 > 0$ , and  $H_3 = h_2h_1 - h_0 > 0$ .  
 816 Thus by Routh-Hurwitz criteria,  $E_0$  is locally asymptotically stable for  $\mathcal{R}_C < 1$  and is unstable for  
 817  $\mathcal{R}_C > 1$ .

818 □

### 819 B.3.2 Global Stability of the Disease-free Equilibrium (DFE)

820 *Remark B.3.* The disease-free equilibrium  $E_0 = \left(\frac{\Lambda_h}{\mu_h}, 0, 0, 0, \frac{\Lambda_v}{\mu_v}, 0\right)$  of model system 1- 2 is globally  
 821 asymptotically stable in  $\Omega$  whenever  $\mathcal{R}_C < 1$  and unstable if  $\mathcal{R}_C > 1$ .

*Proof.* Consider a candidate Lyapunov function defined in  $\Omega$ ,

$$\begin{aligned} \mathcal{L}(t) = & L_1 \left( S_h - S_h^* - S_h^* \log \left( \frac{S_h}{S_h^*} \right) \right) + L_2 A_h + L_3 I_h \\ & + L_4 \left( S_v - S_v^* - S_v^* \log \left( \frac{S_v}{S_v^*} \right) \right) + L_5 I_v \end{aligned} \quad (25)$$

822 where the constants  $L_i, i = 1 \dots 5$  are taken to be  $L_1 = L_2 = \mu_h \mathcal{R}_C^2$ ,  $L_3 = \frac{L_2}{\phi_h}$ , and  $L_4 = L_5 = \frac{\mu_v \mathcal{R}_C^2}{b\beta_{vh}}$ .  
 823 The function  $\mathcal{L}$  is positive definite, in the sense that it vanishes only at the disease-free equilibrium while  
 824 otherwise it is positive in  $\Omega$ . Moreover, taking the time derivative of the function in (25) along solutions  
 825 of system 1-2 and then substituting the expression for the derivatives, gives

$$\begin{aligned} \dot{\mathcal{L}} = & L_1 \left( 1 - \frac{S_h^*}{S_h} \right) \left( \Lambda_v - \frac{b\beta_{vh} I_v S_h}{N_h^*} - \mu_h S_v \right) + L_2 \left( \frac{b\beta_{vh} I_v S_h}{N_h^*} - G_1 A_h \right) + L_3 (\phi_h A_h - G_2 I_h) \\ & + L_4 \left( 1 - \frac{S_v^*}{S_v} \right) \left( \Lambda_v - \frac{b\beta_{hv} S_v I_h}{N_h^*} - \mu_v S_v \right) + L_5 \left( \frac{b\beta_{hv} S_v I_h}{N_h^*} - \mu_v I_v \right) \end{aligned} \quad (26)$$

826

Substituting the  $L_i$  constants in equation 26 and then grouping and collecting terms, gives

$$\dot{\mathcal{L}} = \mu_h \mathcal{R}_C^2 \left( 2 - \frac{S_h}{S_h^*} - \frac{S_h^*}{S_h} \right) + \frac{\mu_v \mathcal{R}_C^2}{b\beta_{vh}} \left( 2 - \frac{S_v}{S_v^*} - \frac{S_v^*}{S_v} \right) + (\mathcal{R}_C^2 - 1) \frac{\mu_v}{\phi_h} (G_1 \mathcal{R}_C^2 G_2 K_h + b\beta_{vh} K_v \phi_h). \quad (27)$$

827 The first two terms are negative, as the arithmetic mean is greater than or equal to the geometrical mean.  
 828 However, the third term is negative for values of  $\mathcal{R}_C < 1$ . Therefore, by Lyapunov-LaSalle asymptotic  
 829 stability [52], the disease-free equilibrium  $E_0$  is globally asymptotically stable if  $\mathcal{R}_C < 1$  for all  $t > 0$ . □

### 830 B.4 Stability Analysis of the Endemic Equilibrium Point, $E^*$

831 As a result of no disease deaths, observed in Figure ??, the existence of a DFE and an Endemic Equilib-  
 832 rium (EE) that depends on  $\mathcal{R}_C$ . In this section, we show the local and global stability of the EE when  
 833  $\mathcal{R}_C^*$  become 1.

834 *Remark B.4.* If  $\mathcal{R}_C > 1$ , then the unique positive endemic equilibrium(EE),  $E^*$ , for Model system  
 835 equations 1-2 is locally asymptotically stable.

836 *Proof.* The EE of the Model system equations 1-2 is given by  $E^*$ . The Jacobian matrix at EE gives by

$$J(E^*) = \begin{bmatrix} -b\beta_{vh}I_v^* - \mu_h & 0 & 0 & 0 & 0 & 0 & -b\beta_{vh}S^* \\ b\beta_{vh}I_v^* & -G_1 & 0 & 0 & 0 & 0 & b\beta_{vh}S^* \\ 0 & \phi_h & -G_3 & 0 & 0 & 0 & 0 \\ 0 & 0 & \theta_h & -G_3 & 0 & 0 & 0 \\ 0 & 0 & 0 & \gamma_h & -\mu_h & 0 & 0 \\ 0 & 0 & -b\beta_{hv}S_v^* & 0 & 0 & -b\beta_{hv}I_h^* - \mu_v & 0 \\ 0 & 0 & b\beta_{hv}S_v^* & 0 & 0 & b\beta_{hv}b\beta_{hv}I_h^* & -\mu_v \end{bmatrix}.$$

It's characteristic polynomial is given by

$$P(\lambda) = (\lambda + \mu_h)(\lambda + G_3)(\mu_v + \lambda)(\lambda^4 + h_3\lambda^3 + h_2\lambda^2 + h_1\lambda + h_0),$$

837 where

$$h_3 = b\beta_{vh}I_v^* + b\beta_{hv}I_h^* + G_2 + G_1 + \mu_v + \mu_h,$$

$$h_2 = b^2\beta_{hv}I_h^*\beta_{vh}I_v^* + b\beta_{hv}I_h^*\mu_h + \mu_v b\beta_{vh}I_v^* + G_2 b\beta_{vh}I_v^* + b\beta_{hv}I_h^*G_2 \\ + G_1 b\beta_{vh}I_v^* + b\beta_{hv}I_h^*G_1 + G_1\mu_h + \mu_v\mu_h + G_2\mu_h + \mu_v G_2 + \mu_v G_1 + G_2 G_1,$$

$$h_1 = \frac{\phi_h, \beta_{hv} b (\beta_{vh} \mu_h \beta_{hv} \phi_h (G_1 + G_2) b^2 + ((G_2 + \mu_v) G_1 + \mu_v G_2) G_1 G_2 \beta_{vh} b + \mu_h G_2^2 G_1^2) \mu_h}{G_1 (G_2 G_1 \mu_v + \mu_h b \beta_{hv} \phi_h) G_2} \\ + \frac{G_1 G_2 \mu_v \mu_h (\mathcal{R}_C^2 - 1)}{b\beta_{vh} + \mu_h},$$

$$h_0 = \mu_v \mu_h G_1 G_2 (\mathcal{R}_C^2 - 1).$$

838 We observe that the characteristic polynomial  $P(\lambda)$  can be factored to roots  $\lambda = -\mu_h, -\mu_v, -G_3$  and

839  $\bar{P}(\lambda) = (\lambda^4 + h_3\lambda^3 + h_2\lambda^2 + h_1\lambda + h_0)$ . Applying the Routh-Hurwitz conditions:  $h_i > 0$ , ( $i = 0, \dots, 4$ ),

840  $h_1 h_2 - h_0 h_3 > 0$ , and  $h_1 h_2 h_3 > h_1 + h_0 h_3^2$ , we find that

$$h_1 h_2 - h_0 h_3 = I_h I_v \beta_{vh} \beta_{hv} (I_h \beta_{hv} + I_v \beta_{vh}) b^3 + \left[ (I_h \beta_{hv} + I_v \beta_{vh})^2 G_1 + (I_h \beta_{hv} + I_v \beta_{vh})^2 G_2 \right. \\ \left. + I_v^2 \mu_v \beta_{vh}^2 + 2 I_h I_v \beta_{hv} (\mu_h + \mu_v) \beta_{vh} + I_h^2 \mu_h \beta_{hv}^2 \right] \cdot b^2 \\ + \left[ (I_h \beta_{hv} + I_v \beta_{vh}) G_1^2 + 2 (I_h \beta_{hv} + I_v \beta_{vh}) (G_2 + \mu_h + \mu_v) G_1 + (I_h \beta_{hv} + I_v \beta_{vh}) G_2^2 \right. \\ \left. + 2 (\mu_h + \mu_v) (I_h \beta_{hv} + I_v \beta_{vh}) G_2 + 2 I_v (\mu_h + 1/2 \mu_v) \mu_v \beta_{vh} + I_h \mu_h \beta_{hv} (\mu_h + 2 \mu_v) \right] \cdot b \\ + ((G_2 + \mu_h + \mu_v) G_1 + (\mu_h + \mu_v) (G_2 + \mu_h)) (G_1 + G_2 + \mu_v) > 0$$

$$\begin{aligned}
 h_1 h_2 h_3 - h_1^2 + h_0 h_3^2 = & \left[ \beta_{hv} I_h I_v \beta_{vh} (G_1 + G_2) b^2 + \right. \\
 & + (((I_h \beta_{hv} + I_v \beta_{vh}) G_2 + \mu_h \beta_{hv} I_h + \mu_v \beta_{vh} I_v) G_1 + G_2 (\mu_h \beta_{hv} I_h + \mu_v \beta_{vh} I_v)) a \\
 & + \mu_h ((G_2 + \mu_v) G_1 + \mu_v G_2) \left. \right] \cdot \left[ \left( b^2 I_h I_v \beta_{vh} \beta_{hv} + \right. \right. \\
 & + ((I_h \beta_{hv} + I_v \beta_{vh}) G_1 + (I_h \beta_{hv} + I_v \beta_{vh}) G_2 + \mu_h \beta_{hv} I_h + \mu_v \beta_{vh} I_v) b \\
 & + (G_2 + \mu_h + \mu_v) G_1 + (\mu_h + \mu_v) G_2 + \mu_h \mu_v \left. \right) \\
 & - \beta_{hv} I_h I_v \beta_{vh} (G_1 + G_2) b^2 \\
 & - \left( ((I_h \beta_{hv} + I_v \beta_{vh}) G_2 + \mu_h \beta_{hv} I_h + \mu_v \beta_{vh} I_v) G_1 + G_2 (\mu_h \beta_{hv} I_h + \mu_v \beta_{vh} I_v) \right) b \\
 & - \mu_h ((G_2 + \mu_v) G_1 + \mu_v G_2) \left. \right] \\
 & - (b (I_h \beta_{hv} + I_v \beta_{vh}) + G_1 + G_2 + \mu_h + \mu_v)^2 b G_1 G_2 (a I_h I_v \beta_{vh} \beta_{hv} + \mu_h \beta_{vh} I_h + \mu_v \beta_{vh} I_v) \\
 & > 0
 \end{aligned}$$

841 hold when  $\mathcal{R}_C > 1$ . Thus, the endemic equilibrium,  $E^*$ , is locally asymptotically stable because all  
 842 eigenvalues of the septic polynomial have all negative real parts for  $\mathcal{R}_C > 1$ .  $\square$

#### 843 B.4.1 Global stability of the Endemic Equilibrium (EE)

844 *Remark B.5.* If  $\mathcal{R}_C > 1$ , then the unique positive endemic equilibrium,  $E^*$ , for Model (1-2) is globally  
 845 asymptotically stable.

*Proof.* Consider a candidate Lyapunov function defined in  $\Omega$ ,

$$\begin{aligned}
 \mathcal{L}(t) = & L_1 \left[ S_h - S_h^* - S_h^* \log \left( \frac{S_h}{S_h^*} \right) \right] + L_2 \left[ A_h - A_h^* - A_h^* \log \left( \frac{A_h}{A_h^*} \right) \right] \\
 & + L_3 \left[ I_h - I_h^* - I_h^* \log \left( \frac{I_h}{I_h^*} \right) \right] + L_4 \left[ S_v - S_v^* - S_v^* \log \left( \frac{S_v}{S_v^*} \right) \right] \\
 & + L_5 \left[ I_v - I_v^* - I_v^* \log \left( \frac{I_v}{I_v^*} \right) \right], \tag{28}
 \end{aligned}$$

where the constants  $L_i, i = 1 \dots 5$  are given by  $L_1 = L_2 = \frac{N_h^*}{b\beta_{vh}I_v^*S_h^*}$ ,  $L_3 = \frac{1}{\phi_h A_h^*}$ , and  $L_4 = L_5 = \frac{N_h^*}{b\beta_{hv}S_v^*I_h^*}$ . Taking the time derivative of the Lyapunov function in (28) along solutions of system 1-2 and then substituting the expression for the derivatives gives

$$\begin{aligned}
 \dot{\mathcal{L}} = & L_1 \left( 1 - \frac{S_h^*}{S_h} \right) \left( \Lambda_h - \frac{b\beta_{vh}I_v S_h}{N_h^*} - \mu_h S_v \right) + L_2 \left( 1 - \frac{A_h^*}{A_h} \right) \left( \frac{b\beta_{vh}I_v S_h}{N_h^*} - G_1 A_h \right) \\
 & + L_3 \left( 1 - \frac{I_h^*}{I_h} \right) (\phi_h A_h - G_2 I_h) + L_4 \left( 1 - \frac{S_v^*}{S_v} \right) \left( \Lambda_v - \frac{b\beta_{hv}S_v I_h}{N_h^*} - \mu_v S_v \right) \\
 & + L_5 \left( 1 - \frac{I_v^*}{I_v} \right) \left( \frac{b\beta_{hv}S_v I_h}{N_h^*} - \mu_v I_v \right). \tag{29}
 \end{aligned}$$



Substituting the  $L_i$  in 29 and performing some algebra gives

$$\begin{aligned} \dot{\mathcal{L}} = & \frac{\mu_h N_h^*}{b\beta_{vh}I_v^*S_h^*} \left( 2 - \frac{S_h}{S_h^*} - \frac{S_h^*}{S_h} \right) + \frac{\mu_h N_h^*}{b\beta_{hv}S_v^*I_h^*} \left( 2 - \frac{S_v}{S_v^*} - \frac{S_v^*}{S_v} \right) \\ & + 5 - \frac{S_v^*}{S_v} - \frac{I_v^*S_vI_h}{S_v^*I_h^*I_v} - \frac{S_h^*}{S_h} - \frac{A_h^*I_vS_h}{I_v^*S_h^*A_h} - \frac{I_h^*A_h}{A_h^*I_h} \end{aligned} \quad (30)$$

846 The first two terms in parenthesis and the remaining expression are negative, as the arithmetic mean  
847 is greater than or equal to the geometrical mean. Therefore, by LaSalle's Invariable Principle [52], the  
848 endemic equilibrium point  $E^*$  is globally asymptotically stable in  $\Omega$  for  $\mathcal{R}_0 > 1$  for all  $t > 0$ .  $\square$

## 849 C Estimating Model Parameters

850 After extensive searching of the literature, annual reports, and census data, ecological and epidemiological  
851 parameter ranges for the respective human and sandfly populations in India and Sudan were gathered  
852 and estimated. See Table 2 for a summary of these estimates.

853 *b*: The per-capita daily biting rate on humans by female Phlebotomus sandflies species differ by geo-  
854 graphical region.

855 **P. Argentipes (India):** On average, the biting rate of a sandfly on a human per night was esti-  
856 mated to be 0.85 *per day* and range from 0.2 to 2.5 per day [51]. More current studies found  
857 a mean estimates biting density per day to be 0.7997 with a range of 0.1667 to 2.0833 per  
858 day [22]. From these studies, we calculated the mean number of bites on a human to be 0.7997  
859 with a range of 0.1667 to 2.083 bites per human.

860 **P. Orientalis (Sudan):** In a field investigations conducted by Elnaiem, et al., the average bites  
861 *per man-night* was estimated to range from 23.7 to 40.3 for no bed net and 4.2 to 9.6 for those  
862 using untreated bed nets over a period of 12 nights [27]. In both studies, an average of 32 bites  
863 *per man-night* was established over a period of 12 nights. In our model we took the average  
864 biting rate to be 1.6208 per man-night with a range of 0.35 to 3.3583 per man-night.

865  $\beta_{hv}$ : The transmission probability that an uninfected sandfly acquires a VL parasite from an infectious  
866 human.

867 **India** Parameter estimates were taken from a recent modeling study on VL in India by Stauch A,  
868 et al. [77,78]. From these, we took the mean transmission potential to be 0.025 with a range  
869 between 0.013 and 0.063.

870 **Sudan** We use the infection rate for sandflies, using an equation from our model to estimate  $\beta_{hv}$ .  
871 We first solve for  $\beta_{hv}$  in this expression and use average infection rates of 9.6% [72], 8.6% [39]  
872 and 6.9%, and 3.6% [30] and the average biting rates in Table 2. The average transmission  
873 potential in human for *P. Orientalis* was estimated to be 0.1275 with a range of 0.0640 to  
874 0.1706.

875  $\beta_{vh}$ : The transmission probability, is the probability that a VL-infectious sandfly transmits to a human.

**India** Parameter estimates were generated by solving for  $\beta_{vh}$  in our  $\mathcal{R}_C$  expression

$$\beta_{vh} = \frac{\mathcal{R}_C^2 \mu_v (\mu_h + \theta_h) (\phi_h + \mu_h)}{\beta_{hv} \phi_h b^2 m_{V:h}} \quad (31)$$

876 and then pairing samples of known values in Table 2 together with an estimated  $\mathcal{R}_C$  value of  
877 2.01 by Mubayi, et al. (2010 [57]). From this calculation, the mean transmission coefficients  
878 were estimated as 0.0694 with a range of 0.0266–0.1652.

879 **Sudan** A similar approach from India was taken and applied to Sudan using know parameter  
880 estimates from Table 2 and an estimated  $\mathcal{R}_C$  value of 1.3 from ELmojtaba, et al, 2010 [26].  
881 The calculations yield an average estimate for  $\beta_{vh}$  as 0.0012 with a range of 0.0007–0.0020.

882  $\mu_v$ : The per-capita daily mortality rate of an adult sandfly, taken as  $1/$  (life expectancy of sandflies)

883 **P. Argentipes (India)** The mortality for this species of sandfly varies between 0.125 to 0.1 [75]  
884 and 0.0667 to 0.1 [65] per day. Some studies established the average lifespan to be, 0.0833 per  
885 day [44,50] and 0.091 per day [77]. For this species, the per-capita mortality rate was averaged  
886 out from these studies to be  $\mu_v = 0.0833$  per day with a range of 0.0667 to 0.1 per day.

887 **P. Orientalis (Sudan)** The adult life span of this species has not been well studied. In one  
888 extensive study, the whole life cycle range was 48–60 days [38]. From this study, the combine  
889 time of the four (4) different developmental larval stages and the pupation stage gives a range  
890 of 40 to 56 days. So, the life span of adult sandflies ranges from 10 to 14 days and average 12  
891 days. For this species, the per-capita mortality rate was averaged out to be,  $\mu_v = 0.0857$  per  
892 day and ranges from 0.1 to 0.0714 per day.

893  $\ell$ : The human landing rate of an adult female sandflies was used as a approximate measure of the human  
894 biting rate. Before the late 1990s, the human landing catches (HLC), was a common way for  
895 measuring the human landing rate of Phlebotomine sandflies. However, for ethical reasons, this  
896 method is less commonly used and has been replaced with the use of human baits and Centers for  
897 Disease Control light traps (CDCLT) to attract female sandflies. In a comparison study, Dilger, E.  
898 (2013) investigated the relationship between the number of sandflies caught by HLC and CDCLT  
899 upon humans and showed that CDCLT are appropriate for estimating the number of sandflies  
900 visiting humans [21]. Various comparatives on HLC and CDCLT were used as measured to establish  
901 an appropriate parameter range for the human landing rate.

902 **P. Argentipes (India)** In this study conducted by Joshi B, et al. (2009) [45] on the collection of  
903 *P. Argentines* per house per night using CDC LT, we took the mean number of landing 12.15  
904 with a range of 8.68 to 17.

905 **P. Orientalis (Sudan)** From a studies conducted on the effectiveness of impregnated bed net on  
906 the landing/bite of female *P. Orientalis* human volunteers by Elnaiem et al. (1999, 2011), we  
907 took the mean number of human landing rate to be 32 landing/human/per day with a range  
908 15.7 to 48.3 landing/human/per day [27, 32].

909  $\mu_h$ : For both India and Sudan, the average life expectancy at birth in a year was collected from multiple  
910 censored data sources. Using these sources, we estimate the per-person/day natural death rate as  
911 (average life expectancy  $\times 365$ )<sup>-1</sup>. For each of these respective regions, the mean and range of the  
912 natural death rates was estimated to be:

913 **India** From the mean data from multiple survey sites, we found the per-capita natural death rate  
914 to be 4.55e-5 (Census of India, 2001), 4.28e-5 (hetv.org, 2012), 4.08e-5 (cia.gov, 2010), 4.33e-5  
915 (WHO, 2012), and 4.27e-5 (un.org, 2012). Combining the estimates of these various value gave  
916 a mean death rate of per human/day and range of 4.05e-5 to 5.03e-5 per human/day.

917 **Sudan** Similarly from India, the per-capita natural death rate was found to be 4.55e-5 (Coutinho,  
918 2005), 4.38e-5 (cia.gov, 2012), 4.49e-5 (unicef.org, 2012), 4.09e-5 (WHO, 2012) and  
919 4.54e-5 (un.org, 2012). The mean death rate of 4.3e-5 per human/day and range of 4.e-5  
920 to 4.54e-5 per human/day.

921  $\phi_h$ : The per-capita rate of progression of humans from the asymptomatic state to the infectious state  
922 here is taken at incubation of VL before becoming symptomatic. The incubating period is known  
923 to vary from weeks to years among different individuals.

924 **India** The day<sup>-1</sup> asymptomatic rate has been estimated to be 0.0086 (day<sup>-1</sup>) [79], 0.0055 [60, 83]  
925 and range between 0.0055 – 0.0164 (day<sup>-1</sup>) [17] and 0.0167 to 0.0083 (day<sup>-1</sup>) [63]. We  
926 consider these estimates and took the asymptomatic rate incubating period,  $\phi_h$ , to be 0.00975  
927 (day<sup>-1</sup>) with a range of 0.006–0.0167 (day<sup>-1</sup>).

928 **Sudan** For this region, the day<sup>-1</sup> asymptomatic rates ranges were estimated to be 0.0083 to 0.01667  
929 (day<sup>-1</sup>) [34], 0.0055 to 0.0164 (day<sup>-1</sup>) [14, 17], and specific mean rates are give in 0.0167  
930 (day<sup>-1</sup>) with a rang of 0.0111 to 0.0042 (day<sup>-1</sup>) [37]. The asymptomatic rate incubating  
931 period, taken as an average of all these studies was taken to be  $\phi_h = 0.0098$  (day<sup>-1</sup>) and range  
932 from 0.0042 to 0.0167 (day<sup>-1</sup>).

933  $\theta_h$ : Treatment rate from VL here is defined as the mean duration of illness before seeking treatment in  
934 some treatment fertility.

935 **India** Current estimates for treatment were found to be 1.996 (who2007), 4 months (0.5–19 months)  
936 [2], 4 months [7], and 3.5 [8]. From these study we took the mean estimated treatment rate  
937 per day was  $\theta_h = 0.0351$  (day<sup>-1</sup>) with a range of 0.0067 to 0.0597 (day<sup>-1</sup>).

938 **Sudan** The estimated mean rates per person/day varied from 0.0164 [18, 59], 0.0130, 0.0055 [3],  
939 0.0108 (0.0027–0.0408) [46], (0.0033–0.0235) [56] and a range of 0.0111–0.0056 in [73]. We took  
940 the mean estimate for  $\theta_h$  as 0.014275 (day<sup>-1</sup>) with a range of 0.0027 to 0.0408 (day<sup>-1</sup>).

941  $\Lambda_h$ : The per-capita recruitment rates is defined as the sum per-capita birth rate and per-capita net  
942 migration rate of the population.

943 **India** To estimate the per-capita recruitment rate, we use demographic data on population size,  
944 birth rate, and migration from CIA World Factbook. The average estimated recruitment rate  
945 was calculated as the sum of the birth rate and net immigration per day and is given by 8.3e-5  
946 persons per day, ranging from 7.67e-5 to 9.22e-5 persons per day.

947 **Sudan** Similar to the estimation for India, the average estimated recruitment was 1.27e-4 persons  
948 per day, with a range of 1.1e-4 to 1.35e-4 persons per day.

949  $\Lambda_v$ : The per-capita daily adult sandfly recruitment rate of female phlebotomus sandfly. Seasonality plays  
950 a role in the abundance of the sandfly population in each geographical region. Few studies have  
951 established an average recruitment rate for sandflies to  $0.02128 \times N_h$  per day [75] and 0.299 per  
952 day [47]. For our model, we consider the recruitment rate for both species to be  $\Lambda_v = 0.1601$  per  
953 day and range from 0.0213 to 0.299 per day.

954  $P_{I_h}$ : Prevalence for VL in humans is defined as the proportion of people with the disease at a given point  
955 in time.

956 **India** To estimate the per day prevalence, a study based on Serodiagnostic Test in Madhepura  
957 District of Bihar, India, was considered by Srivastava N, et al., 2014 [76]. From this study, we  
958 use the annual prevalence per 10000 of 26.92 in 2010 and 23.78 in 2011 together with the total  
959 population of Madhepura assumed to be at risk to estimate the per person per day prevalence.  
960 The prevalence range was estimated to be between 0.0013 to 0.0015 persons per day.

961 **Sudan** A Survey study by Khalil et al. 2000 [48], gave the prevalence of active disease a range  
962 from 40 to 80 per 1000. Using these estimates, together with reported estimates of the at risk  
963 population in Pigott et al., 2014 [66], a rough estimate of the daily prevalence range of 0.0006  
964 to 0.0013 persons per was generated for Sudan's population.

965  $P_{I_v}$ : Prevalence for VL in sandflies is defined as the proportion of sandflies with VL at a given point in  
966 time.

| Species       | Point Prevalence of sandflies |        |        |                  |
|---------------|-------------------------------|--------|--------|------------------|
|               | Min                           | Max    | Mean   | Reference        |
| P. argentipes | 0.0085                        | 0.0284 | -      | [82]             |
|               | 0.005                         | 0.05   | -      | [58]             |
|               | 0.007                         | 0.02   | -      | [64, 69, 71, 81] |
| P. orientalis | 0.019                         | 0.05   | -      | [32]             |
|               | 0.0054                        | 0.037  | 0.0157 | [40]             |
|               | 0.035                         | 0.071  | -      | [30]             |

**Table 14.** Point Prevalence Estimates for VL in India and Sudan for Host and Vector From Various Sample-Based Field Studies.

967  $\mathcal{R}_C$ : Estimated ranges for both countries were taken from previous mathematical and modeling studies.

968 **India**  $\mathcal{R}_{C_I}$  was estimated to  $2.0 \pm 0.25$  [57, 77]

969 **Sudan**  $\mathcal{R}_{C_S}$  was estimated to be  $1.3 \pm 0.25$  [26]

| India       |         |         |            |                         |                     |                         |
|-------------|---------|---------|------------|-------------------------|---------------------|-------------------------|
| Year        | $\mu_v$ | $\mu_h$ | $N_h$      | $\Lambda_h = \mu_h N_h$ | $N_v = m_{v:h} N_h$ | $\Lambda_v = \mu_v N_v$ |
| 2000        | 0.0833  | 4.41e-5 | 1042261758 | 45937                   | 5492719465          | 392337105               |
| 2001        | 0.0833  | 4.38e-5 | 1059500888 | 46402                   | 5583569680          | 398826406               |
| 2002        | 0.0833  | 4.35e-5 | 1076705723 | 46861                   | 5674239160          | 405302797               |
| 2003        | 0.0833  | 4.33e-5 | 1093786762 | 47311                   | 5764256236          | 411732588               |
| 2004        | 0.0833  | 4.30e-5 | 1110626108 | 47750                   | 5852999589          | 418071399               |
| 2005        | 0.0833  | 4.27e-5 | 1127143548 | 48178                   | 5940046498          | 424289036               |
| 2006        | 0.0833  | 4.25e-5 | 1143289350 | 48597                   | 6025134875          | 430366777               |
| 2007        | 0.0833  | 4.23e-5 | 1159095250 | 49011                   | 6108431968          | 436316569               |
| 2008        | 0.0833  | 4.21e-5 | 1174662334 | 49425                   | 6190470500          | 442176464               |
| 2009        | 0.0833  | 4.19e-5 | 1190138069 | 49847                   | 6272027624          | 448001973               |
| 2010        | 0.0833  | 4.17e-5 | 1205624648 | 50280                   | 6353641895          | 453831564               |
| 2011        | 0.0833  | 4.15e-5 | 1221156319 | 50723                   | 6435493801          | 459678129               |
| 2012        | 0.0833  | 4.14e-5 | 1236686732 | 51173                   | 6517339078          | 465524220               |
| 2013        | 0.0833  | 4.12e-5 | 1252139596 | 51621                   | 6598775671          | 471341119               |
| <b>Min</b>  |         | 4.42e-5 | 1042261758 | 45937                   | 5492719465          | 392337105               |
| <b>Mean</b> |         | 4.55e-5 | 1149486935 | 48794                   | 6057796146          | 432699725               |
| <b>Max</b>  |         | 4.73e-5 | 1252139596 | 51621                   | 6598775671          | 471341119               |

**Table 15.** Estimate for Parameters  $\Lambda_h$  and  $\Lambda_v$  Using Mean Estimates for India in Table 2 and World Bank's Demographic Estimates in [35]

| Sudan       |         |         |          |                         |                     |                         |
|-------------|---------|---------|----------|-------------------------|---------------------|-------------------------|
| Year        | $\mu_v$ | $\mu_h$ | $N_h$    | $\Lambda_h = \mu_h N_h$ | $N_v = m_{v:h} N_h$ | $\Lambda_v = \mu_v N_v$ |
| 2000        | 0.0857  | 4.73e-5 | 27729798 | 1310                    | 146136035           | 10438288                |
| 2001        | 0.0857  | 4.70e-5 | 28434810 | 1335                    | 149851449           | 10703675                |
| 2002        | 0.0857  | 4.67e-5 | 29186427 | 1362                    | 153812470           | 10986605                |
| 2003        | 0.0857  | 4.63e-5 | 29973979 | 1389                    | 157962869           | 11283062                |
| 2004        | 0.0857  | 4.60e-5 | 30778572 | 1417                    | 162203074           | 11585934                |
| 2005        | 0.0857  | 4.57e-5 | 31585871 | 1444                    | 166457540           | 11889824                |
| 2006        | 0.0857  | 4.54e-5 | 32397535 | 1472                    | 170735009           | 12195358                |
| 2007        | 0.0857  | 4.52e-5 | 33218250 | 1500                    | 175060178           | 12504298                |
| 2008        | 0.0857  | 4.49e-5 | 34040065 | 1529                    | 179391143           | 12813653                |
| 2009        | 0.0857  | 4.47e-5 | 34853178 | 1559                    | 183676248           | 13119732                |
| 2010        | 0.0857  | 4.46e-5 | 35652002 | 1589                    | 187886051           | 13420432                |
| 2011        | 0.0857  | 4.44e-5 | 36430923 | 1618                    | 191990964           | 13713640                |
| 2012        | 0.0857  | 4.43e-5 | 37195349 | 1647                    | 196019489           | 14001392                |
| 2013        | 0.0857  | 4.42e-5 | 37964306 | 1676                    | 200071893           | 14290849                |
| <b>Min</b>  |         | 4.42e-5 | 27729798 | 1310                    | 146136035           | 10438288                |
| <b>Mean</b> |         | 4.55e-5 | 32817219 | 1489                    | 172946744           | 12353339                |
| <b>Max</b>  |         | 4.73e-5 | 37964306 | 1676                    | 200071893           | 14290849                |

**Table 16.** Estimate for Parameters  $\Lambda_h$  and  $\Lambda_v$  Using Mean Estimates for Sudan in Table 2 and World Bank's Demographic Estimates in [36]
